17 **ABSTRACT**

18 The benefits and efficacy of control programs for herds infected with *Mycobacterium avium*  
19 subsp. *paratuberculosis* (**MAP**) have been investigated under various contexts. However, most  
20 previous research investigated paratuberculosis control programs in isolation, without modeling  
21 the potential association with other dairy diseases. This paper evaluated the benefits of MAP  
22 control programs when the herd is also affected by mastitis, a common disease causing the  
23 largest losses in dairy production. The effect of typically suggested MAP controls were estimated  
24 under the assumption that MAP infection increased the rate of clinical mastitis. We evaluated  
25 one hundred twenty three control strategies comprising various combinations of testing, culling,  
26 and hygiene, and found that the association of paratuberculosis with mastitis alters the ranking of  
27 specific MAP control programs, but only slightly alters the cost-effectiveness of particular MAP  
28 control components, as measured by the distribution of net present value of a representative U.S.  
29 dairy operation. In particular, although testing and culling for MAP resulted in a reduction in  
30 MAP incidence, that control led to lower net present value (**NPV**) per cow. When testing was  
31 used, ELISA was more cost-effective than alternative testing regimes, especially if mastitis was  
32 explicitly modeled as more likely in MAP-infected animals, but ELISA testing was only  
33 significantly associated with higher NPV if mastitis was not included in the model at all.  
34 Additional hygiene was associated with a lower NPV per cow, although it lowered MAP  
35 prevalence. Overall, the addition of an increased risk of mastitis in MAP-infected animals did not  
36 change model recommendations as much as failing to consider mastitis at all.

37 **Key Words:** paratuberculosis; economic model; disease control; mastitis

38 **1. INTRODUCTION**

39 Paratuberculosis, or Johne's Disease, is a chronic intestinal disease of ruminants caused by  
40 infection with *Mycobacterium avium* subsp. *paratuberculosis* (**MAP**). Animals are usually  
41 infected at a young age, with a variable and often extended latent period [1]. Infected animals  
42 have lower milk production [2–9], decreased reproductive performance in later stages of disease  
43 [6,10–12], and are often culled early [5,13]. It is difficult to control MAP in dairy herds; many  
44 tests have poor diagnostic sensitivity [14], MAP persists in the environment for long periods of  
45 time [15], paratuberculosis symptoms are slow to develop [16], and the available vaccines are  
46 limited in distribution due to their cross-reaction with tuberculosis diagnostics [17].

47 The debate over the economically optimal control method for MAP results from a wide range of  
48 models and assumptions. Some studies have found test and culling to be consistently cost-  
49 effective [18,19], while others have found that cost-efficacy of test and cull required subsidized  
50 testing costs [20] or only culling of animals with decreased milk production during MAP latency  
51 [21]. Simulation models have identified cost-effective programs, such as quarterly serum  
52 enzyme-linked immunosorbent assay (**ELISA**) testing [22], quarterly milk ELISA testing [23],  
53 risk-based testing accompanied by infection control [24], vaccination or infection control [25],  
54 testing in series with ELISA and quantitative polymerase chain reaction (**qPCR**) [26], and  
55 annual fecal culture accompanied by infection control [27]. Massaro et al. [28] found that a more  
56 sensitive ELISA test could be cost-effective in US dairy herds. Others have found that hygiene  
57 improvement was effective in decreasing transmission rate [25,29], especially in combination  
58 with testing and culling [1,30]. Our previous work found that some MAP control programs were  
59 not significantly better than no control, and that some managerial practices can produce better  
60 results than some testing and culling controls (Smith et al., 2017; Verteramo Chiu et al., 2018).

61 One factor that none of these studies addressed is the role of MAP infection in susceptibility to  
62 other infections. For example, higher mastitis incidence has been found in MAP positive farms in  
63 two different studies [32,33], and Rossi et al. [34] found that MAP-infected animals had  
64 significantly higher rates of clinical mastitis. As clinical mastitis is one of the most economically  
65 important diseases of dairy herds, a positive association between MAP infection and mastitis  
66 could greatly increase the cost-effectiveness of MAP and mastitis control. Even with no  
67 association, controlling for either disease may have spillover effects on the other disease.

68 The goal of this research is to examine the economic consequences of paratuberculosis in US  
69 dairy herds and the benefits of 123 specific control strategies involving various combinations of  
70 hygiene levels, types of testing, and decisions on culling, while accounting for the rise in mastitis  
71 cases associated with paratuberculosis infection.

## 72 **2. MATERIALS AND METHODS**

73 The infection and testing model (Figure 1) has been previously described [35], and used for an  
74 economic analysis of MAP [31]. This is a continuous-time model, simulated over 5 years after a  
75 burn-in of 50 years using values representative of US dairy herds. Details are available in the  
76 supplemental material (S1). Briefly, calves may be born susceptible or infected via vertical  
77 transmission. Susceptible calves may be infected by contact with transiently-shedding infected  
78 calves or with shedding adults. All calves age into heifers; susceptible heifers may be infected by  
79 contact with shedding adults, while infected heifers are assumed to be latently infected. All  
80 heifers age into adults. Adults infected as calves or heifers may have progressing infections,  
81 resulting in fast transition from latency, through a low-shedding phase, to high shedding and  
82 clinical disease. However, some adults infected as calves or heifers and all adults infected by  
83 contact with shedding adults experience non-progressing infections, which remain in latency for

84 a longer period of time and only enter the low-shedding phase. All animals may be culled or die,  
85 based on an age-appropriate mortality/culling rate.

86

87 **Figure 1.** Schematic of model for *Mycobacterium avium* subsp. *paratuberculosis* in a  
88 commercial dairy herd

89

90 The economic model tracks the daily milk production of all animals in the herd and calculates  
91 the net value of the herd as the value of the milk produced plus the value of any culled animals  
92 sold, minus the cost of producing milk, the cost of raising calves, the cost of raising heifers, and  
93 the cost of MAP testing.

#### 94 **2.1 Mastitis Risk and Milk Production**

95 The risk of first clinical mastitis (CM) case, and the incidence of CM, has been found to be  
96 associated with MAP infection status in cows [34], possibly due to the immune system being  
97 affected by MAP. Clinical mastitis risk was assumed to be constant for all cows; although  
98 clinical mastitis risk is known to increase with parity, this model was not age-stratified, thereby  
99 averaging out clinical mastitis risk among all animals. Annualized risk of CM by all causes was  
100 calculated from Bar et al. [36] by averaging the monthly risk over a 10 month lactation and  
101 across the first 4 lactations, then adding the total monthly risk,  $annualrisk = 10 *$

102  $\sum_{p=1}^4 \frac{\sum_{m=1}^{10} \frac{risk_{p,m}}{10}}{4}$ . The range of possible values was identified by adding up the monthly risk for

103 each lactation individually ( $\sum_{m=1}^{10} risk_{p,m}$ ). Due to the lack of data to support modeling of

104 secondary CM cases or subclinical mastitis, these events were not modeled.

105 In order to determine if the effect of CM on milk production would be exacerbated by MAP  
106 status, we statistically analyzed milk production in animals with well-defined MAP infection  
107 status as described previously [9]. Briefly, we conducted a linear regression analysis to assess the  
108 effect of MAP progression (defined as progressing, non-progressing, or test-negative, where  
109 progressing animals had at least one high-positive test result) and current MAP status (defined as  
110 test-negative, latent, low-shedding, or high-shedding). In this analysis, a dichotomous term was  
111 added to indicate whether an animal had experienced a CM event in the previous 30 days. In the  
112 previous study, the linear score (log<sub>10</sub> of the somatic cell count) was included to control for  
113 subclinical and clinical mastitis; in this analysis, that variable was not included to avoid  
114 collinearity with the CM variable.

## 115 **2.2 Model Simulation**

116 The model was simulated under 3 different assumptions: CM association with MAP (**MA**), no  
117 CM association with MAP (**NMA**), and no CM at all (**NM**). In the MA scenario, the rate of CM  
118 cases was assumed to be related to MAP status. The hazard ratios from the Cox proportional  
119 hazards model for MAP positive vs. negative animals [34], controlling for parity, were used to  
120 inflate the CM risk for MAP positive animals. In the NMA scenario, the rate of CM cases was  
121 assumed to be unchanged by MAP status. In the NM scenario, it was assumed that CM cases  
122 were excluded in the model. In the MA and NMA scenarios, CM occurred in susceptible adults  
123 at rate  $\psi$ , the annualized risk, and in MAP infected adults at rate  $\xi_I\psi$ , where  $\xi_I$  is the hazard ratio  
124 1.89 [34].

125 Upon the occurrence of a CM case, the following actions occurred: 1) remove the milk lost due  
126 to CM,  $q_{mast}$ , from the period's milk production; 2) add the cost of treating CM,  $t_{mast}$ , to the

127 period's cost; 3) determine if the CM case resulted in mortality. Clinical mastitis mortality was  
128 assumed to be  $\mu_m$ . It was assumed that no voluntary culling occurred due to a first case of CM.

129 The net present value (*NPV*) of each scenario was calculated as

$$130 \quad NPV = \sum_t \frac{\kappa(t)}{(1+r)^t} + \frac{\kappa(T)}{r(1+r)^{T+1}} \quad (2)$$

131 where,  $t$  is time in years,  $\kappa(t)$  is the value of the herd in year  $t$ ,  $r$  is the discount rate, and  $T$  is the  
132 final time period. The second term represents a terminal wealth term, the NPV of the last year  
133 cash flow continuing into perpetuity, to account for the value of the herd going forward past the  
134 terminal year of  $T$ . Herds were simulated for 5 years, which is considered a realistic planning  
135 window for commercial dairy herds.

### 136 **2.3 Determining Stochastic Dominance**

137 Ranking of control programs by the distribution of NPV from 100 iterations of a five year period  
138 was performed using first and second-order dominance [37]. First-order and second-order  
139 stochastic dominance are methods of determining preference for an activity with variable  
140 (stochastic) results; a dominant strategy by either method is to be preferred to its comparator. First-  
141 order stochastic dominance is relevant for decision makers who prefer more wealth to less wealth  
142 (increasing utility function), and second-order stochastic dominance is relevant for decision  
143 makers who in addition to preferring more to less wealth are also risk averse (increasing and  
144 concave utility function).

145 Briefly, if  $NPV_A$  is the cumulative distribution function of the NPV of control strategy A and  
146  $NPV_B$  is the cumulative distribution function of the NPV of control strategy B, first-order  
147 dominance of strategy A states that

148 
$$P(NPV_A \geq x) \geq P(NPV_B \geq x) \quad (3)$$

149 for all possible values of  $x$  (the range of simulated NPV values for a farm in a given scenario)

150 and with a strict inequality for at least one value of  $x$ .

151 Likewise, second-order dominance of strategy A states that

152 
$$AUC(NPV_A)[0 : x] < AUC(NPV_B)[0 : x] \quad (4)$$

153 for all possible values of  $x$  (as in equation 3), where  $AUC(i)[0 : x]$  is the area under the curve of the

154 cumulative distribution function of distribution  $i$  from 0 to  $x$ .

#### 155 **2.4 Analyzing Dominance Results**

156 Each of the 123 control strategies comprises four components: hygiene level, test used, test  
157 frequency, and which animals are culled (Supplemental Information S2). To estimate the effect  
158 of each of these components on dominance, we estimated a linear regression of the proportion of  
159 dominated strategies under SOSD on each of the strategies' components, measured by dummy  
160 variables. The econometric model has the following form,

161 
$$Y_i = \alpha + \beta_i^H H_i + \beta_i^T T_i + \beta_i^C C_i + \beta_i^F F_i + \varepsilon_i \quad (4)$$

162 Where  $Y_i$  is the proportion that strategy  $i$  SOSD the other strategies, where the value of  $Y$  ranges  
163 from 0 to 1.  $H$  is an  $n \times 2$  matrix of hygiene level indicators (standard and high hygiene),  $T$  is an  
164  $n \times 4$  matrix of test indicator (FC, ELISA, PCR, and hypothetical testing of calves with FC),  $C$  is  
165 an  $n \times 2$  matrix of culling policy (cull all test positive, and cull all high shedders),  $F$  is an  $n \times 4$   
166 matrix of frequency of testing (annual, biannual, continuous annual, continuous biannual).

167 Parameter  $\alpha$  is the intercept term, which includes the effects of moderate hygiene, and culling

168 after 2 positive tests. Parameters  $\beta^H, \beta^T, \beta^C, \beta^F$  are vectors to be estimated for each of the



169 components of the strategies. This regression is conducted separately for each of the three  
170 mastitis assumptions and assumes additive linear effects only. To determine which factors are  
171 most associated with changes in the NPV, this analysis was repeated using the difference  
172 between the NPV of a particular iteration and the NPV of no control from the same starting  
173 condition, expressed as an amount per cow, as the  $Y$ . Each of these analyses was repeated for  
174 each of the mastitis assumptions (NM, NMA, and MA) and the fitted coefficients were  
175 compared. The analysis was repeated at two different herd sizes (100 and 1000) and two  
176 different initial MAP prevalence levels (7% and 20%), but results will focus on the 1000-head  
177 herd with 20% initial prevalence.

## 178 **2.5 Sensitivity Analysis**

179 Global sensitivity analysis was performed using optimized Latin Hypercube sampling via the *lhs*  
180 package [39] with 500 parameter sets. For each parameter set, a 1000 head herd was simulated 100  
181 times from the same randomly drawn initial population values under three generalized culling  
182 strategies (none, cull all positive adults, and cull all positive calves) with and without improved  
183 hygiene. Impact of parameters on NPV was determined using the Pearson's rank correlation  
184 coefficient. All parameters used are shown in Tables 1-3. Where variability in parameters was not  
185 provided by the source, parameters were varied by  $\pm 10\%$  for the sensitivity analysis. Where  
186 variability in parameters was available, parameters were varied over their interquartile ranges.  
187 Testing parameters were varied over the range of the interquartile ranges of all tests, and hygiene  
188 parameters were varied over the range of the possible additional hygiene levels. Parameters were  
189 considered significantly related to NPV at the level of  $\alpha = 0.05$  with Bonferroni's correction.

190 **Table 1.** Biological parameters and interquartile ranges (IQR) used in a model of *Mycobacterium*  
191 *avium* subsp. *paratuberculosis* and clinical mastitis co-infection in a dairy herd.

| Par. | Description | Value (IQR) | Source |
|------|-------------|-------------|--------|
|------|-------------|-------------|--------|

|                      |                                                                                        |                              |                 |
|----------------------|----------------------------------------------------------------------------------------|------------------------------|-----------------|
| $\mu_1$              | removal rate of calves (/year)                                                         | 0.09 (0.08-0.1)              | [40]            |
| $\mu_2$              | removal rate of heifers (/year)                                                        | 0.01 (0.008-0.015)           | [40]            |
| $\mu_3$              | removal rate of adults (/year)                                                         | 0.35 (0.3-0.4)               | [40]            |
| $\mu_{b,base}$       | birth rate of female calves (/adult/year)                                              | 0.45 (0.4-0.5)               | [40]            |
| $\mu_{b,H}$          | birth rate of high shedding dams (/adult/year)                                         | 0.15 (0.1-0.45)              | [11]            |
| $\gamma_E$           | proportion of calves of latent animals infected at birth                               | 0.01 (0-0.04)                | [40]            |
| $\gamma_L, \gamma_H$ | proportion of calves of shedding animals infected at birth                             | 0.04 (0.01-0.08)             | [40]            |
| $\rho_1, \rho_2$     | aging rate (/year)                                                                     | 1 (0.8-1.2)                  | Assumed         |
| $\eta$               | proportion of infected heifers becoming progressing adults                             | 0.335 (0.5-1)                | [40]            |
| $\varphi$            | transition rate from transient shedding to latent (/year)                              | 2 (0.8-3)                    | [40]            |
| $\sigma_L$           | transition rate from latent to low shedding, low path (/year)                          | 0.53 (0.44-0.67)             | [35]            |
| $\sigma_H$           | transition rate from latent to low shedding, high path (/year)                         | 21.5 (1.75-40)               | [35]            |
| $\nu_H$              | transition rate from low to high shedding, high path (/year)                           | 1.08 (0.75-1.94)             | [35]            |
| $\alpha$             | clinical disease-related culling rate (/year)                                          | 0.67 (0.5-0.8)               | [11]            |
| $\beta$              | transmission coefficient for 7% and 20% initial prevalence (/year) in a 1000-head herd | 0.001, 0.003 (0.0023-0.0012) | calculated      |
| $e_\beta$            | proportional transmission effect due to improved and moderately improved hygiene       | 0.6, 0.98 (0.6-0.98)         | [41,42]<br>[43] |
| $\psi$               | risk of clinical mastitis (/year)                                                      | 0.27 (0.12-0.42)             | [36]            |
| $\xi_I$              | hazard ratio for clinical mastitis in infected cows                                    | 1.89 (1.53-2.33)             | [34]            |
| $\mu_m$              | risk of mortality during clinical mastitis                                             | 0.0175 (0.01-0.02)           | [36]            |

192

193 **Table 2.** Testing parameters and interquartile ranges (IQR) used in a model of *Mycobacterium*  
194 *avium* subsp. *paratuberculosis* infection in a dairy herd.

| Par.        | Description                            | Value (IQR)                                     | Source     |
|-------------|----------------------------------------|-------------------------------------------------|------------|
| $Se_H^E$    | Sensitivity of ELISA for high-shedders | 0.78 (0.68-0.86)                                | [44,45]    |
| $Se_H^K$    | Sensitivity of KELA for high-shedders  | 0.31 (0.11-0.67)                                | [46]       |
| $Se_L^E$    | Sensitivity of ELISA for low-shedders  | 0.24 (0.19-0.30)                                | [44,45]    |
| $Se_H^{FC}$ | Sensitivity of FC for high-shedders    | 0.9 (0.75-1)                                    | [47]       |
| $Se_L^{FC}$ | Sensitivity of FC for low-shedders     | 0.5 (0.25-0.75)                                 | [48]       |
| $Se_H^P$    | Sensitivity of PCR for high-shedders   | 0.84 (0.77-0.90)                                | [44,49,50] |
| $Se_H^Q$    | Sensitivity of qPCR for high-shedders  | 0.737 (0.49-0.90)                               | [26]       |
| $Se_L^P$    | Sensitivity of PCR for low-shedders    | 0.47 (0.41-0.54)                                | [44,49,50] |
| $Sp^E$      | Specificity of ELISA                   | 0.97 (0.91-0.99)                                | [48,51-53] |
| $Sp_H^K$    | Specificity of KELA for high-shedders  | 0.997 (0.952-0.999)                             | [46]       |
| $Sp^F$      | Specificity of FC                      | 0.98 (0.92-1)                                   | [52,53]    |
| $Sp^P$      | Specificity of PCR                     | 0.94 (0.87-1)                                   | [49,52]    |
| $Sp_H^Q$    | Specificity of qPCR for high-shedders  | 0.943 (0.80-0.99)                               | [26]       |
| $Se_C$      | Sensitivity of calf testing            | 0.5 (0.25-0.75)                                 | assumed    |
| $Sp_C$      | Specificity of calf testing            | 0.98 (0.92-1)                                   | assumed    |
| $\delta_C$  | Culling rate of test-positive calves   | $Se_C T_1 + (1 - Sp_C) S_1$                     | calculated |
| $\delta_L$  | Culling rate of low-positive adults    | $Se_L (L_P + L_N) + (1 - Sp) (E_P + E_N + S_3)$ | calculated |
| $\delta_H$  | Culling rate of high-positive adults   | $Se_H H + (1 - Sp) (E_P + E_N + S_3)$           | calculated |

195

196 **Table 3.** Economic parameters and inter-quartile ranges (IQR) used in a model of  
197 *Mycobacterium avium* subsp. *paratuberculosis* and mastitis co-infection in dairy herds.

| Cost                 | Description                                                                                                  | Value (IQR)            | Reference |
|----------------------|--------------------------------------------------------------------------------------------------------------|------------------------|-----------|
| $prev$               | prevalence of MAP infection in purchased cows                                                                | 0.094 (0.077-0.111)    | [54]      |
| $C_{FC}$             | cost of fecal culture test per animal                                                                        | \$36 (\$25-\$42)       | [55–58]   |
| $C_E$                | cost of ELISA test per animal                                                                                | \$6 (\$4-\$8)          | [55–59]   |
| $C_P$                | cost of PCR test per animal                                                                                  | \$32 (\$32-40)         | [55–59]   |
| $\omega_{hyg,mod}$   | Annual cost of implementing moderate hygiene per adult (clean milk)                                          | \$35.54                | [21]      |
| $\omega_{hyg,large}$ | Annual cost of implementing improved hygiene per adult (clean milk, separate calving pens, separate housing) | \$49.64                | [21]      |
| $C_{cow}$            | Daily operating cost per kg milk produced                                                                    | \$0.35 (0.33-0.37)     | [60]      |
| $C_{heifer}$         | Daily operating cost of raising a calf/heifer                                                                | \$2.995 (2.662-3.403)  | [61]      |
| $P_{cow}$            | Cull-cow price per kg                                                                                        | \$1.9671 (1.7292-2.31) | [62]      |
| $P_{milk}$           | Milk price per kg                                                                                            | \$0.444 (0.394-0.482)  | [62]      |
| $P_{sale}$           | Sale price of replacement heifer                                                                             | \$2232 (2000-2500)     | [61]      |
| $Q_{cull}$           | Average cull cow weight                                                                                      | 680.4 kg (660-700)     | [63]      |
| $Q_{milk,S}$         | Average daily milk production per uninfected cow                                                             | 32.62 kg (25.45-42.73) | [9]       |
| $Q_{milk,EN}$        | Average daily milk production per latent cow (non-progressing)                                               | 32.17 kg (24.09-42.73) | [9]       |
| $Q_{milk,LN}$        | Average daily milk production per low-shedding cow (non-progressing)                                         | 30.94 kg (24.09-42.73) | [9]       |
| $Q_{milk,EP}$        | Average daily milk production per latent cow (progressing)                                                   | 33.12 kg (22.27-39.09) | [9]       |
| $Q_{milk,LP}$        | Average daily milk production per low-shedding cow (progressing)                                             | 29.13 kg (22.27-39.09) | [9]       |
| $Q_{milk,H}$         | Average daily milk production per high-shedding cow                                                          | 22.17 kg (12.27-32.27) | [9]       |
| $\psi_H$             | Proportional adjustment in cull weight for high-shedding cows                                                | 0.9 (0.75-1)           | assumed   |
| $t_{mast}$           | Treatment cost per clinical mastitis case                                                                    | \$50 (35.50-73.50)     | [36]      |
| $q_{mast}$           | Milk loss per clinical mastitis case                                                                         | 90.3 kg (64-183)       | [64]      |
| $r$                  | Discount rate                                                                                                | 0.02 (0.01-0.08)       | assumed   |

198

## 199 3. RESULTS

### 200 3.1 Milk Production Results

201 There were 31,583 monthly milk observations available for analysis, of which 537 occurred  
 202 within a month of a CM event. Of those, 424 were in test-negative individuals, 97 were in non-  
 203 progressing animals (85 latent, 12 low-shedding), and 16 were in progressing animals (14 latent,  
 204 2 low-shedding). Adding a variable indicating a recent CM did not improve the fit of the model  
 205 including an interaction between MAP progression and status (BIC=216,536 with the term and

206 BIC=216,527 without the term), so milk loss in animals with both MAP infection and CM was  
 207 simulated to be additive.

### 208 **3.2 Model Results**

209 For simplicity, we will present rankings of only 13 potential control options, and the results of  
 210 SOSD only, as SOSD implies FOSD. The base for comparison is no MAP control. If testing is  
 211 used, we assume that it will be based on the serum enzyme-linked immunosorbent assay  
 212 (ELISA) test, administered to all animals either annually or biannually. Animals may be culled  
 213 after any positive test, only after a test result indicating a high-positive response, or only after the  
 214 second positive test result. Additionally, the farm may choose to continue ELISA testing after 5  
 215 negative whole-herd tests, or to discontinue testing after the 5th negative whole-herd test.

216 Model results for this subset of control options are shown in Table 4 for a 1,000 head herd with  
 217 20% initial shedding prevalence under CM association with MAP (**MA**), no CM association with  
 218 MAP (**NMA**), and no CM at all (**NM**); results for other initial herd sizes and initial shedding  
 219 prevalence are generally similar, and are shown in Supplemental Table S3. The model predicted  
 220 that all control programs would decrease the median true infection prevalence of  
 221 paratuberculosis over 5 years, and most would decrease the median shedding prevalence (Figure  
 222 2).

223 **Table 4.** ELISA-based testing strategies and their NPV distribution and number of second-order  
 224 dominated strategies for each mastitis scenario. Results are for a 20% initial MAP prevalence in  
 225 a 1,000 head herd.

|                                   | Mastitis Association<br>(MA)            |      | No Mastitis Association<br>(NMA)        |      | No Mastitis<br>(NM)                     |      |
|-----------------------------------|-----------------------------------------|------|-----------------------------------------|------|-----------------------------------------|------|
|                                   | median NPV<br>(range), x10 <sup>6</sup> | SOSD | median NPV<br>(range), x10 <sup>6</sup> | SOSD | median NPV<br>(range), x10 <sup>6</sup> | SOSD |
| <b>No control</b>                 | 20.36<br>(16.76,23.63)                  | 5    | 20.55<br>(16.99,23.85)                  | 11   | 21.08<br>(14.59,26.41)                  | 1    |
| <b>Annual ELISA,<br/>cull all</b> | 17.97<br>(13.44,21.79)                  | 0    | 18.29<br>(12.74,22.02)                  | 0    | 18.4<br>(10.95,23.13)                   | 0    |

|                                               |                        |   |                        |   |                        |   |
|-----------------------------------------------|------------------------|---|------------------------|---|------------------------|---|
| <b>Annual ELISA,<br/>cull high</b>            | 20.25<br>(15.97,24.97) | 2 | 20.15<br>(15.21,23.74) | 1 | 20.5<br>(16.07,24.86)  | 2 |
| <b>Annual ELISA,<br/>cull after 2</b>         | 19.85<br>(17.14,23.82) | 4 | 19.75<br>(15.52,24.48) | 1 | 20.28<br>(17.22,23.36) | 3 |
| <b>Biannual ELISA,<br/>cull all</b>           | 19.95<br>(16.74,24.52) | 2 | 19.96<br>(16.92,23.39) | 3 | 20.58<br>(15.72,24.79) | 1 |
| <b>Biannual ELISA,<br/>cull high</b>          | 19.77<br>(16.18,23.43) | 1 | 19.84<br>(16.33,23.13) | 1 | 20.43<br>(16.59,23.12) | 2 |
| <b>Biannual ELISA,<br/>cull after 2</b>       | 19.69<br>(16.53,22.88) | 1 | 20.43<br>(16.35,23.76) | 5 | 20.11<br>(16.33,24.7)  | 2 |
| <b>Cont. annual<br/>ELISA, cull all</b>       | 19.94<br>(16.69,23.82) | 6 | 20.13<br>(15.92,24.22) | 2 | 20.45<br>(16.19,24.51) | 3 |
| <b>Cont. annual<br/>ELISA, cull high</b>      | 20.40<br>(16.65,23.66) | 6 | 20.56<br>(16.06,23.69) | 5 | 20.57<br>(17.43,24.02) | 8 |
| <b>Cont. annual<br/>ELISA, cull after 2</b>   | 20.17<br>(16.69,23.79) | 4 | 20.46<br>(16.76,24.22) | 6 | 20.55<br>(16.95,24.85) | 6 |
| <b>Cont. biannual<br/>ELISA, cull all</b>     | 20.02<br>(17.53,24.17) | 4 | 19.89<br>(16.52,23.81) | 1 | 20.14<br>(15.9,23.58)  | 1 |
| <b>Cont. biannual<br/>ELISA, cull high</b>    | 20.16<br>(16.35,23.74) | 3 | 20.02<br>(16.17,24.6)  | 1 | 20.41<br>(17.62,24.56) | 6 |
| <b>Cont. biannual<br/>ELISA, cull after 2</b> | 20.21<br>(15.48,23.64) | 1 | 20.20<br>(15.84,24.22) | 3 | 20.05<br>(16.7,23.99)  | 1 |

226 SOSD is the number of strategies (of the 13 presented) second-order dominated.

227

228 **Figure 2.** Predicted change in shedding prevalence of paratuberculosis infection after 5 years of  
229 control in a 1,000 cow herd with a median initial prevalence of 20%.

230

### 231 *3.3 Stochastic Dominance Results*

232 Regression results for the econometric model of SOSD rank for each of the CM scenarios and  
233 MAP prevalence are shown in Figure 3 and Table 5, using results of all 123 control  
234 combinations (S2). All six regressions have a similar set of significant variables, but their effects  
235 can be different across herds. Not testing was consistently significantly worse than annual  
236 testing, with the exception being in a herd with low initial prevalence and assuming NMA.  
237 Biannual testing was not significantly different from annual testing in most scenarios.  
238 Continuing to test after 5 negative whole-herd tests was significantly better than discontinuing

239 testing. ELISA testing was significantly better than FC or testing calves in the MA and NM  
 240 scenarios, but not in the NMA scenario. However, in the NMA scenario with high initial  
 241 prevalence, FC and PCR were significantly worse than testing calves. High levels of hygiene  
 242 were significantly worse than standard in all cases, and moderate levels of hygiene were  
 243 significantly worse than standard in most cases.

244

245 **Figure 3.** Coefficients from multivariable linear regressions for the overall second-order stochastic  
 246 dominance rank (1=best, 123=worst) of MAP control programs, separated by herd size, initial  
 247 shedding prevalence, and assumption about relationship between MAP and clinical mastitis (MA:  
 248 mastitis association; NMA: no mastitis association; NM: no mastitis). Central bar is estimate, box  
 249 shows 95% confidence interval around estimate.

250

251 **Table 5.** Linear regression results of the proportion of dominated strategies under SOSD on  
 252 strategy characteristics on all initial herds. Constant term includes the effects of annual  
 253 continuous testing of calves, culling animals after one positive test, and standard hygiene. Model  
 254 assumes additive linear effects.

|                                               |          | Mastitis Association Scenario (MA) |                                   | No Mastitis Association Scenario (NMA) |                                 | No Mastitis Scenario (NM)         |                                   |
|-----------------------------------------------|----------|------------------------------------|-----------------------------------|----------------------------------------|---------------------------------|-----------------------------------|-----------------------------------|
|                                               |          | 20%                                | 7%                                | 20%                                    | 7%                              | 20%                               | 7%                                |
| <b>Constant</b>                               |          | 42.8<br>(33.7,51.9)                | 38.8<br>(29.8,47.8)               | 41.7<br>(34.1,49.3)                    | 53.7<br>(47,60.4)               | 39.1<br>(30.1,48.2)               | 39<br>(30.4,47.5)                 |
| <b>Test frequency</b>                         | Biannual | 1.6<br>(-3.2,6.5)                  | 1.7<br>(-3.1,6.5)                 | 4.8<br>(0.7,8.8)                       | -2.6<br>(-6.2,1)                | 3<br>(-1.9,7.8)                   | <b>5</b><br><b>(0.4,9.5)</b>      |
|                                               | None     | <b>44.1</b><br><b>(26.5,61.7)</b>  | <b>46.4</b><br><b>(29.1,63.7)</b> | <b>26.4</b><br><b>(11.8,41)</b>        | 8.9<br>(-4,21.8)                | <b>46.7</b><br><b>(29.2,64.2)</b> | <b>45.6</b><br><b>(29.1,62.1)</b> |
| <b>Test discontinued after 5 negative WHT</b> |          | <b>31.5</b><br><b>(26.6,36.4)</b>  | <b>32.3</b><br><b>(27.5,37.1)</b> | <b>17.7</b><br><b>(13.6,21.7)</b>      | <b>8.9</b><br><b>(5.3,12.5)</b> | <b>32.7</b><br><b>(27.9,37.6)</b> | <b>33.5</b><br><b>(28.9,38.1)</b> |
| <b>Test type</b>                              | FC       | 4.5<br>(-5.1,14.1)                 | 9<br>(-0.5,18.5)                  | <b>8.8</b><br><b>(0.8,16.8)</b>        | -0.4<br>(-7.5,6.6)              | 4.3<br>(-5.3,13.8)                | 5.7<br>(-3.3,14.7)                |
|                                               | ELISA    | -16.3<br>(-25.9,-6.6)              | -11.7<br>(-21.2,-2.2)             | 1.5<br>(-6.5,9.5)                      | -4<br>(-11.1,3.1)               | -14.7<br>(-24.3,-5.2)             | -18<br>(-27,-9)                   |
|                                               | PCR      | -3.5<br>(-13.1,6.1)                | 2.5<br>(-7,11.9)                  | <b>8.4</b><br><b>(0.4,16.4)</b>        | 1.3<br>(-5.8,8.3)               | 1.7<br>(-7.9,11.3)                | -5<br>(-14,4.1)                   |

|                     |          |                    |                    |                   |                   |                    |                  |
|---------------------|----------|--------------------|--------------------|-------------------|-------------------|--------------------|------------------|
| <b>Culled after</b> | high     | -3.2               | -4.3               | -5.1              | -3.3              | -1.9               | 2                |
|                     | positive | (-9.5,3)           | (-10.5,1.9)        | (-10.3,0.2)       | (-8,1.3)          | (-8.1,4.4)         | (-3.9,7.9)       |
|                     | second   | -0.8               | -6.8               | -7.5              | -3.2              | -2.6               | 0.6              |
| <b>Hygiene</b>      | positive | (-7.1,5.5)         | (-13,-0.5)         | (-12.7,-2.3)      | (-7.9,1.4)        | (-8.8,3.7)         | (-5.4,6.5)       |
|                     | Moderate | 4.1                | <b>7.4</b>         | <b>6.3</b>        | <b>12</b>         | <b>7.8</b>         | 3.9              |
|                     | High     | (-1.8,10)          | <b>(1.5,13.2)</b>  | <b>(1.4,11.2)</b> | <b>(7.6,16.3)</b> | <b>(1.9,13.7)</b>  | (-1.7,9.4)       |
|                     |          | <b>18.8</b>        | <b>19</b>          | <b>14.4</b>       | <b>11.8</b>       | <b>16.8</b>        | <b>18.5</b>      |
|                     |          | <b>(12.9,24.7)</b> | <b>(13.1,24.8)</b> | <b>(9.5,19.3)</b> | <b>(7.5,16.2)</b> | <b>(10.9,22.7)</b> | <b>(12.9,24)</b> |

255 Values in bold were associated with significantly worse SOSD ranking, while those in italics  
 256 were associated with significantly better SOSD ranking.

257

258 Regression results for the econometric model of NPV for each of the CM scenarios and herds are  
 259 shown in Figure 4. Biannual testing was significantly associated with a lower NPV compared to  
 260 not testing, as was annual testing in almost all cases. Use of an ELISA test was significantly  
 261 associated with a higher NPV than other test choices. Moderate or high hygiene levels were  
 262 significantly associated with a lower NPV than standard hygiene. In a large herd, culling only  
 263 high positive cows or after the second positive test was significantly associated with a slightly  
 264 higher NPV; this relationship was not seen in small herds. There were few differences in  
 265 coefficient values across CM scenarios.

266

267 **Figure 4.** Coefficients from multivariable linear regressions for change in NPV per cow by  
 268 adding MAP control programs, separated by herd size, initial shedding prevalence, and  
 269 assumption about relationship between MAP and clinical mastitis (MA: mastitis association;  
 270 NMA: no mastitis association; NM: no mastitis). Central bar is estimate, box shows 95%  
 271 confidence interval around estimate.

272

273 **3.4 Sensitivity Analysis Results**

274 The partial rank correlation coefficients of all significantly correlated parameters from the global  
275 sensitivity analysis are shown in Figure 5. Most scenarios had the same parameters consistently  
276 related with NPV, primarily economic and production-related parameters. The risk of clinical  
277 mastitis was significantly related to NPV in all scenarios.

278

279 **Figure 5.** Partial rank correlation coefficients (PRCC) from a global sensitivity analysis on net  
280 present value over 5 years of paratuberculosis control, assuming an association between mastitis  
281 incidence and MAP infection.

282

#### 283 **4. DISCUSSION**

284 This research shows that consideration of interacting disease systems does not importantly  
285 change the results of an economic analysis of disease control. Adding an increased rate of CM  
286 among infected animals to an economic model of paratuberculosis control only slightly changed  
287 the ranking of control programs. Specifically, failing to include CM in the model resulted in a  
288 weaker preference for standard hygiene alone. Including CM but not its association with  
289 paratuberculosis resulted in a stronger preference for standard hygiene alone, biannual ELISA  
290 testing and culling adults after 2 positive tests, and continuous ELISA with the same culling  
291 policy. Culling for paratuberculosis should in theory have the side benefit of partially controlling  
292 for CM. However, the inclusion of an association between CM and paratuberculosis did not  
293 change the overall conclusions of this economic model. This is likely due to two factors: the high  
294 cost of MAP control and the relatively small size of the impact of MAP on mastitis.



295 We believe that the high cost of MAP control is the reason that few control strategies have been  
296 shown to economically dominate no control. If the cost of implementing testing or hygiene, not  
297 including costs related to culling of animals, were removed from the NPV, the distributions are  
298 somewhat similar for many control programs (Supplemental Figure, S5). However, the cost of  
299 these programs is high (Supplemental Table, S4): over a 5 year period, in a 1,000-head herd, the  
300 discounted cost of testing all adults annually via ELISA was calculated at \$16,148. Testing all  
301 adult cows biannually using fecal culture or PCR was more than an order of magnitude higher.  
302 These numbers do not include the costs of culling test-positive animals, or the lower income due  
303 to smaller milking herd sizes after test-based culling in closed herds, each of which would raise  
304 the cost of control even more.

305 Previous studies have disagreed as to the cost-effectiveness of testing for MAP. While some  
306 models suggest that test and cull programs are effective at reducing the prevalence of MAP [30],  
307 others suggest that they are not sufficient to control MAP by themselves [23,65]. Our work here  
308 has shown that they are capable of decreasing the shedding prevalence of MAP, but are unlikely  
309 to be cost-effective. The exception would be ELISA testing, which others have also found to be  
310 potentially cost-effective [28]. This is likely due to the low cost and fast turn-around time for  
311 ELISA results.

312 We found here that hygiene was not cost-effective by any measure, and that this was unrelated to  
313 the relationship between MAP and mastitis. We had hypothesized that expensive control  
314 programs such as hygiene improvement (estimated here to cost a 1,000-head herd between  
315 \$95,652 and \$133,600 over a five year period) would become cost-effective as their effect on  
316 other pathogens was considered. The hygiene changes made to improve MAP control, however,  
317 are unlikely to directly impact CM incidence. While other models have suggested that hygiene

318 changes are indeed cost-effective [29], these may be assuming a lower base hygiene level than  
319 our simulated herds. There also may be more benefits from hygiene improvement over a longer  
320 time frame than the 5 years used here.

321 Our model did not show a strong effect of paratuberculosis association with CM on economically  
322 optimal control. The global sensitivity analysis also showed that the hazard ratio for CM  
323 incidence in MAP-infected animals was not significantly associated with NPV. Likely, this is  
324 because the association between paratuberculosis and CM is so small in a practical sense. The  
325 hazard ratio for first CM cases among MAP-infected animals is 1.89 (IQR: 1.53-2.33). However,  
326 with an annualized rate of 0.27 CM cases/animal/year, this translates into an annual average of  
327 27 extra cases of CM in a 1,000 head herd with 20% MAP infection prevalence. Given a cost per  
328 case of CM of \$90, not counting mortality, the additional cost to the herd is approximately  
329 \$2,500. Discounted over a 5 year simulation period, that results in a total cost of \$11,655 due to  
330 additional CM cases. This is less than the cost of the least expensive MAP control program  
331 (annual ELISA testing), and, as no program can immediately eliminate MAP in the herd, not all  
332 of the potential cost from the increased CM cases would be avoided by implementing control.

333 One large limitation of this model was the lack of age stratification, resulting in the necessary  
334 simplification of constant clinical mastitis risk. It is known that clinical mastitis risk increases  
335 with parity [66] and changes throughout the lactation [36]. However, accounting for age and  
336 lactation stage in a compartmental model would cause the model to become intractable. For more  
337 realistic modeling frameworks, it becomes necessary to transition to a more computationally  
338 demanding modeling system, such as the agent-based model presented in Verteramo Chiu et al.  
339 [67].

340 Regardless of the effects of MAP associations with CM, some overall preferences were  
341 determined. On average, continuing to test and cull after 5 negative whole-herd tests was always  
342 preferred. ELISA was the best-ranked test, followed by no testing. Standard hygiene was always  
343 preferred, with increasing hygiene levels associated with economically worse-ranked programs.

## 344 **5. CONCLUSION**

345 We have found that, in the setting of a typical commercial US dairy, the addition of clinical  
346 mastitis to a model for MAP control only slightly changed the ranking of individual control  
347 programs, but did not greatly change the overall cost-effectiveness of components of MAP  
348 control. These suggest that only testing by ELISA may be cost-effective.

349

## 350 **6. ACKNOWLEDGEMENTS**

351 The authors gratefully acknowledge funding provided by the National Institute of Food and  
352 Agriculture of the United States Department of Agriculture through NIFA Award No. 2014-  
353 67015-2240 as part of the joint USDA-NSF-NIH-BBSRC-BSF Ecology and Evolution of  
354 Infectious Diseases program. The funding sources played no role in the research.

355

## 356 **7. REFERENCES**

- 357 1. Marcé C, Ezanno P, Weber MF, Seegers H, Pfeiffer DU, Fourichon C. Modeling within-  
358 herd transmission of *Mycobacterium avium* subspecies paratuberculosis in dairy cattle: a  
359 review. *J Dairy Sci.* Elsevier; 2010;93: 4455–70. doi:10.3168/jds.2010-3139
- 360 2. Kudahl AB, Nielsen SS, Sørensen JT. Relationship between antibodies against

- 361 Mycobacterium avium subsp. paratuberculosis in milk and shape of lactation curves. *Prev*  
362 *Vet Med.* 2004;62: 119–134. doi:10.1016/j.prevetmed.2003.11.008
- 363 3. Aly SS, Anderson RJ, Adaska JM, Jiang J, Gardner IA. Association between  
364 Mycobacterium avium subspecies paratuberculosis infection and milk production in two  
365 California dairies. *J Dairy Sci.* Elsevier; 2010;93: 1030–40. doi:10.3168/jds.2009-2611
- 366 4. Nielsen SS, Krogh MA, Enevoldsen C. Time to the occurrence of a decline in milk  
367 production in cows with various paratuberculosis antibody profiles. *J Dairy Sci.* Elsevier;  
368 2009;92: 149–55. doi:10.3168/jds.2008-1488
- 369 5. Lombard JE, Garry FB, McCluskey BJ, Wagner BA. Risk of removal and effects on milk  
370 production associated with paratuberculosis status in dairy cows. *J Am Vet Med Assoc.*  
371 2005;227: 1975–1981. doi:10.2460/javma.2005.227.1975
- 372 6. Raizman EA, Fetrow JP, Wells SJ, Godden SM, Oakes MJ, Vazquez G. The association  
373 between Mycobacterium avium subsp. paratuberculosis fecal shedding or clinical Johne’s  
374 disease and lactation performance on two Minnesota, USA dairy farms. *Prev Vet Med.*  
375 2007;78: 179–195. doi:10.1016/j.prevetmed.2006.10.006
- 376 7. Gonda MG, Chang YM, Shook GE, Collins MT, Kirkpatrick BW. Effect of  
377 Mycobacterium paratuberculosis infection on production, reproduction, and health traits in  
378 US Holsteins. *Prev Vet Med.* 2007;80: 103–119. doi:10.1016/j.prevetmed.2007.01.011
- 379 8. Sorge US, Lissemore KD, Godkin A, Hendrick SH, Wells SJ, Kelton DF. Associations  
380 between paratuberculosis milk ELISA result, milk production, and breed in Canadian  
381 dairy cows. *J Dairy Sci.* 2011;94: 754–761.
- 382 9. Smith RL, Gröhn YT, Pradhan AK, Whitlock RH, Kessel JS Van, Smith JM, et al. The

- 383 effects of progressing and nonprogressing *Mycobacterium avium* ssp . paratuberculosis  
384 infection on milk production in dairy cows. J Dairy Sci. American Dairy Science  
385 Association; 2016;99: 1383–1390. doi:10.3168/jds.2015-9822
- 386 10. Vanleeuwen JA, Haddad JP, Dohoo IR, Keefe GP, Tiwari A, Tremblay R. Associations  
387 between reproductive performance and seropositivity for bovine leukemia virus, bovine  
388 viral-diarrhea virus, *Mycobacterium avium* subspecies paratuberculosis, and *Neospora*  
389 *caninum* in Canadian dairy cows. Prev Vet Med. Elsevier B.V.; 2010;94: 54–64.  
390 doi:10.1016/j.prevetmed.2009.11.012
- 391 11. Smith RL, Strawderman RL, Schukken YH, Wells SJ, Pradhan AK, Espejo LA, et al. The  
392 effect of Johne’s disease status on reproduction and culling in dairy cattle. J Dairy Sci.  
393 2010;93: 3513–3524.
- 394 12. Marcé C, Beaudeau F, Bareille N, Seegers H, Fourichon C. Higher non-return rate  
395 associated with *Mycobacterium avium* subspecies paratuberculosis infection at early stage  
396 in Holstein dairy cows. Theriogenology. 2009;71: 807–16.  
397 doi:10.1016/j.theriogenology.2008.10.017
- 398 13. Tiwari A, VanLeeuwen JA, Dohoo IR, Stryhn H, Keefe GP, Haddad JP. Effects of  
399 seropositivity for bovine leukemia virus, bovine viral diarrhoea virus, *Mycobacterium*  
400 *avium* subspecies paratuberculosis, and *Neospora caninum* on culling in dairy cattle in  
401 four Canadian provinces. Vet Microbiol. 2005;109: 147–158.  
402 doi:10.1016/j.vetmic.2005.05.011
- 403 14. Barkema HW, Orsel K, Nielsen SS, Koets AP, Rutten VPMG, Bannantine JP, et al.  
404 Knowledge gaps that hamper prevention and control of *Mycobacterium avium* subspecies

- 405 *paratuberculosis* infection. *Transbound Emerg Dis.* 2017;65: 125–148.  
406 doi:10.1111/tbed.12723
- 407 15. Moravkova M, Babak V, Kralova a, Pavlik I, Slana I. Culture and quantitative IS900  
408 Real-time PCR-based analysis of the persistence of *Mycobacterium avium* subsp.  
409 *paratuberculosis* in a controlled dairy cow farm environment. *Appl Environ Microbiol.*  
410 2012;78: 6608. doi:10.1128/AEM.01264-12
- 411 16. Ferrouillet C, Wells SJ, Hartmann WL, Godden SM, Carrier J. Decrease of Johne’s  
412 disease prevalence and incidence in six Minnesota, USA, dairy cattle herds on a long-term  
413 management program. *PrevVetMed.* 2009;88: 128–137.
- 414 17. Garcia AB, Shalloo L. Invited review : The economic impact and control of  
415 *paratuberculosis* in cattle. *J Dairy Sci. American Dairy Science Association;* 2015;98: 1–  
416 21. doi:10.3168/jds.2014-9241
- 417 18. Pillars RB, Grooms DL, Wolf CA, Kaneene JB. Economic evaluation of Johne’s disease  
418 control programs implemented in Michigan dairy farms. *Prev Vet Med.* 2009;90: 223–  
419 232.
- 420 19. Radia D, Bond K, Limon G, van Winden S, Guitian J. Relationship between periparturient  
421 management, prevalence of MAP and preventable economic losses in UK dairy herds. *Vet*  
422 *Rec.* 2013;173: 343-+. doi:10.1136/vr.101408
- 423 20. Groenendaal H, Wolf CA. Farm-level economic analysis of the US national Johne’s  
424 Disease Demonstration Herd Project. *J Am Vet Med Assoc.* 2008;233: 1852–1858.
- 425 21. Wolf R, Clement F, Barkema HW, Orsel K. Economic evaluation of participation in a  
426 voluntary Johne’s disease prevention and control program from a farmer’s perspective-

- 427 The Alberta Johne's Disease Initiative. *J Dairy Sci.* Elsevier; 2014;97: 2822–34.  
428 doi:10.3168/jds.2013-7454
- 429 22. Robins J, Bogen S, Francis A, Westhoek A, Kanarek A, Lenhart S, et al. Agent-based  
430 model for Johne's disease dynamics in a dairy herd. *Vet Res. Veterinary Research*;  
431 2015;46: 68. doi:10.1186/s13567-015-0195-y
- 432 23. Kudahl AB, Sørensen JT, Nielsen SS, Østergaard S. Simulated economic effects of  
433 improving the sensitivity of a diagnostic test in paratuberculosis control. *Prev Vet Med.*  
434 2007;78: 118–29. doi:10.1016/j.prevetmed.2006.10.004
- 435 24. Kudahl AB, Nielsen SS, Østergaard S. Economy, efficacy, and feasibility of a risk-based  
436 control program against paratuberculosis. *J Dairy Sci.* 2008;91: 4599–609.  
437 doi:10.3168/jds.2008-1257
- 438 25. Groenendaal H, Galligan DT. Economic consequences of control programs for  
439 paratuberculosis in midsize dairy farms in the United States. *J Am Vet Med Assoc.*  
440 2003;223: 1757–1763.
- 441 26. Aly SS, Anderson RJ, Whitlock RH, Fyock TL, McAdams SC, Byrem TM, et al. Cost-  
442 effectiveness of diagnostic strategies to identify *Mycobacterium avium* subspecies  
443 paratuberculosis super-shedder cows in a large dairy herd using antibody enzyme-linked  
444 immunosorbent assays, quantitative real-time polymerase chain reaction, and bacte. *J Vet*  
445 *Diagnostic Investig.* 2012;24: 821–32. doi:10.1177/1040638712452107
- 446 27. Cho J, Tauer LW, Schukken YH, Smith RL, Lu Z, Gröhn YT. Cost Effective Control  
447 Strategies for Johne's Disease in Dairy Herds. *Can J Agric Econ.* 2013;61: 583–608.  
448 doi:10.1111/j.1744-7976.2012.01270.x

- 449 28. Massaro T, Lenhart S, Spence M, Drakes C, Yang G, Agosto F, et al. Modeling For Cost  
450 Analysis Of Johne's Disease Control Based On EVELISA Testing. *J Biol Syst.* 2013;21:  
451 1340010. doi:10.1142/S021833901340010X
- 452 29. Dorshorst NC, Collins MT, Lombard JE. Decision analysis model for paratuberculosis  
453 control in commercial dairy herds. *Prev Vet Med. Elsevier;* 2006;75: 92–122. Available:  
454 <http://www.sciencedirect.com/science/article/pii/S0167587706000547>
- 455 30. Konboon M, Bani-yaghoub M, Id POP, Rhee N, Id SA. A nested compartmental model to  
456 assess the efficacy of paratuberculosis control measures on U . S . dairy farms. 2018; 1–  
457 25.
- 458 31. Smith RL, Al-Mamun MA, Gröhn YT. Economic consequences of paratuberculosis  
459 control in dairy cattle: A stochastic modeling study. *Prev Vet Med. Elsevier B.V.;*  
460 2017;138: 17–27. doi:10.1016/j.prevetmed.2017.01.007
- 461 32. Diéguez FJ, Arnaiz I, Sanjuan ML, Vilar MJ, Yus E. Management practices associated  
462 with *Mycobacterium avium* subspecies paratuberculosis infection and the effects of the  
463 infection on dairy herds. *Vet Rec.* 2008;162: 614–617. doi:162/19/614 [pii]
- 464 33. Arrazuria R, Arnaiz I, Fouz R, Calvo C, Eiras C, Diaguez F. Association between  
465 *Mycobacterium avium* subsp . paratuberculosis infection and culling in dairy cattle herds  
466 Asociación entre la infección por *Mycobacterium avium* subsp . paratuberculosis y las  
467 causas de eliminación en rebaños de ganado lechero. *Arch Med Vet.* 2008;44: 39–44.  
468 doi:10.4067/S0301-732X2014000100006
- 469 34. Rossi G, Gröhn YT, Schukken YHYHYH, Smith RL. The effect of *Mycobacterium avium*  
470 subspecies paratuberculosis infection on clinical mastitis occurrence in dairy cows. *J*



- 471 Dairy Sci. American Dairy Science Association; 2017;100: 7446–7454.  
472 doi:10.3168/jds.2017-12721
- 473 35. Smith RL, Schukken YH, Gröhn YT. A new compartmental model of *Mycobacterium*  
474 *avium* subsp *paratuberculosis* infection dynamics in cattle. *Prev Vet Med. Elsevier B.V.*;  
475 2015;122: 298–305. doi:10.1016/j.prevetmed.2015.10.008
- 476 36. Bar D, Tauer LW, Bennett GJ, González RN, Hertl JA, Schukken YH, et al. The cost of  
477 generic clinical mastitis in dairy cows as estimated by using dynamic programming. *J*  
478 *Dairy Sci.* 2008;91: 2205–14. doi:10.3168/jds.2007-0573
- 479 37. Levy H. Stochastic Dominance and Expected Utility : Survey and Analysis. *Management*  
480 *Sci.* 1992;38: 555–593.
- 481 38. Tversky A, Kahneman D. Rational Choice and the Framing of Decisions Author. *J Bus.*  
482 1986;59: S251–S278.
- 483 39. Carnell R. lhs: Latin Hypercube Samples [Internet]. 2017. Available: [https://cran.r-](https://cran.r-project.org/package=lhs)  
484 [project.org/package=lhs](https://cran.r-project.org/package=lhs)
- 485 40. Mitchell RM, Whitlock RH, Gröhn YT, Schukken YH. Back to the real world:  
486 Connecting models with data. *Prev Vet Med. Elsevier B.V.*; 2015;118: 215–225.  
487 doi:10.1016/j.prevetmed.2014.12.009
- 488 41. Collins MT, Eggleston V, Manning EJB. Successful control of Johne’s disease in nine  
489 dairy herds: results of a six-year field trial. *J Dairy Sci. Elsevier*; 2010;93: 1638–43.  
490 doi:10.3168/jds.2009-2664
- 491 42. Benedictus A, Mitchell RM, Linde-Widmann M, Sweeney RW, Fyock TL, Schukken YH,

- 492 et al. Transmission parameters of *Mycobacterium avium* subspecies paratuberculosis  
493 infections in a dairy herd going through a control program. *Prev Vet Med.* 2008;83: 215–  
494 227. doi:10.1016/j.prevetmed.2007.07.008
- 495 43. Nielsen SS, Toft N. Effect of management practices on paratuberculosis prevalence in  
496 Danish dairy herds. *J Dairy Sci.* 2011;94: 1849–1857.
- 497 44. Clark DL, Koziczkowski JJ, Radcliff RP, Carlson RA, Ellingson JLE. Detection of  
498 *Mycobacterium avium* subspecies paratuberculosis: comparing fecal culture versus serum  
499 enzyme-linked immunosorbent assay and direct fecal polymerase chain reaction. *J Dairy*  
500 *Sci. Elsevier;* 2008;91: 2620–7. doi:10.3168/jds.2007-0902
- 501 45. Sweeney RW, Whitlock RH, McAdams SC, Fyock TL. Longitudinal Study of ELISA  
502 Seroreactivity to *Mycobacterium Avium* subsp. Paratuberculosis in Infected Cattle and  
503 Culture-Negative Herd Mates. *J Vet Diagnostic Investig.* 2006;18: 2–6.  
504 doi:10.1177/104063870601800102
- 505 46. van Schaik G, Stehman SM, Jacobson RH, Schukken YH, Shin SJ, Lein DH. Cow-level  
506 evaluation of a kinetics ELISA with multiple cutoff values to detect fecal shedding of  
507 *Mycobacterium avium* subspecies paratuberculosis in New York State dairy cows. *Prev*  
508 *Vet Med. Department of Population Medicine and Diagnostic Sciences, College of*  
509 *Veterinary Medicine, Cornell University, Ithaca, NY 14853, USA;* 2005;72: 221–236.  
510 doi:10.1016/j.prevetmed.2005.01.019
- 511 47. Collins MT, Gardner IA, Garry F, Roussel AJ, Wells SJ. Consensus recommendations on  
512 diagnostic testing for the detection of paratuberculosis in cattle in the United States. *J Am*  
513 *Vet Med Assoc.* 2006;229: 1912–1919. Available:

- 514 <http://avmajournals.avma.org/doi/abs/10.2460/javma.229.12.1912>
- 515 48. Whitlock RH, Wells SJ, Sweeney RW, Van Tiem J. ELISA and fecal culture for  
516 paratuberculosis (Johne's disease): sensitivity and specificity of each method. *Vet*  
517 *Microbiol.* New Bolton Center, University of Pennsylvania, 382 West Street Road,  
518 Kennett Square, PA 19348, USA. whitlock@vet.upenn.edu; 2000;77: 387–398. Available:  
519 <http://www.sciencedirect.com/science/article/pii/S0378113500003242>
- 520 49. Taddei S, Robbi C, Cesena C, Rossi I, Schiano E, Arrigoni N, et al. Detection of  
521 *Mycobacterium Avium* Subsp. Paratuberculosis in Bovine Fecal Samples: Comparison of  
522 Three Polymerase Chain Reaction--Based Diagnostic Tests with a Conventional Culture  
523 Method. *J Vet Diagnostic Investig.* 2004;16: 503–508. doi:10.1177/104063870401600603
- 524 50. Leite FL, Stokes KD, Robbe-Austerman S, Stabel JR. Comparison of fecal DNA  
525 extraction kits for the detection of *Mycobacterium avium* subsp. paratuberculosis by  
526 polymerase chain reaction. *J Vet Diagnostic Investig.* 2013;25: 27–34.  
527 doi:10.1177/1040638712466395
- 528 51. Meens E, Rambaud T, Arnaud D. Evaluation of diagnostic tests to classify cattle, in  
529 control plans, according to their levels of excretion of *Mycobacterium avium*  
530 Paratuberculosis. 12th International Colloquium on Paratuberculosis. Parma, Italy; 2014.  
531 p. P-03.13.
- 532 52. Vitale N, Possidente R, D'Errico V, Dondo A, Bergagna S, Barbero R, et al. Estimating  
533 diagnostic accuracy of paratuberculosis (PTB) diagnostic test with latent class models.  
534 12th International Colloquium on Paratuberculosis. Parma, Italy; 2014. p. P-02.10.
- 535 53. Sweeney RW, Gardner IA, Hines MEI, Anderson R, Byrem TM, Collins MT, et al.

- 536 Comparison of 3 fecal culture, 2 fecal PCR, 2 serum ELISA, and milk ELISA for  
537 diagnosis of paratuberculosis in US dairy cattle. 12th International Colloquium on  
538 Paratuberculosis. Parma, Italy; 2014. p. P-02.47.
- 539 54. Adaska JM, Anderson RJ. Seroprevalence of Johne's-disease infection in dairy cattle in  
540 California, USA. *Prev Vet Med*. California Animal Health and Food Safety Laboratory,  
541 Tulare Facility, 18830 Road 112, Tulare, CA 93274, USA. [jmadaska@ucdavis.edu](mailto:jmadaska@ucdavis.edu);  
542 2003;60: 255–261.
- 543 55. Cornell University Animal Health Diagnostic Center. Test and Fee Schedule [Internet].  
544 2015. Available: <https://ahdc.vet.cornell.edu/>
- 545 56. Collins MT, Manning EJB. Testing Services. In: Johne's Information Center [Internet].  
546 2015. Available: <http://www.johnes.org/testserv/index.html#tests>
- 547 57. Besser T. New Strategies for Johne's Disease Testing. In: Washington Animal Disease  
548 Diagnostic Lab [Internet]. 2015 [cited 10 Dec 2015]. Available:  
549 <http://waddl.vetmed.wsu.edu/animal-disease-faq/johne's-testing>
- 550 58. Tests and Fees. In: Iowa State Veterinary Diagnostic Laboratory [Internet]. 2015 [cited 10  
551 Dec 2015]. Available: [http://vetmed.iastate.edu/veterinary-diagnostic-laboratory-vdl/tests-](http://vetmed.iastate.edu/veterinary-diagnostic-laboratory-vdl/tests-and-fees#j)  
552 [and-fees#j](http://vetmed.iastate.edu/veterinary-diagnostic-laboratory-vdl/tests-and-fees#j)
- 553 59. Indiana Animal Disease Diagnostic Laboratory. Fee Schedule [Internet]. 2015 [cited 10  
554 Dec 2015]. Available: <https://www.addl.purdue.edu/TestsFees/ByTest.aspx>
- 555 60. USDA:ERS. National Milk Cost of Production. In: Milk Cost of Production Estimates  
556 [Internet]. 2010 [cited 9 Sep 2015]. Available: [http://www.ers.usda.gov/data-](http://www.ers.usda.gov/data-products/milk-cost-of-production-estimates.aspx)  
557 [products/milk-cost-of-production-estimates.aspx](http://www.ers.usda.gov/data-products/milk-cost-of-production-estimates.aspx)

- 558 61. Karszes J. Dairy Replacement Programs : Costs & Analysis 3 rd Quarter 2012. 2014;
- 559 62. USDA:NASS. Quick Stats. In: Quick Stats. 2015.
- 560 63. USDA. Agricultural Prices Summary 2003–2007. In: Agricultural Prices [Internet]. 2008.  
561 Available: [http://usda.mannlib.cornell.edu/MannUsda/view-](http://usda.mannlib.cornell.edu/MannUsda/view-DocumentInfo.do?documentID=1003)  
562 [DocumentInfo.do?documentID=1003](http://usda.mannlib.cornell.edu/MannUsda/view-DocumentInfo.do?documentID=1003).
- 563 64. Bar D, Gröhn YT, Bennett GJ, González RN, Hertl JA, Schulte HF, et al. Effect of  
564 repeated episodes of generic clinical mastitis on milk yield in dairy cows. *J Dairy Sci.*  
565 2007;90: 4643–53. doi:10.3168/jds.2007-0145
- 566 65. Groenendaal H, Nielen M, Jalvingh AW, Horst SH, Galligan DT, Hesselink JW. A  
567 simulation of Johne’s disease control. *Prev Vet Med.* 2002;54: 225–245. Available:  
568 [http://www.sciencedirect.com/science/article/B6TBK-45X2PMN-](http://www.sciencedirect.com/science/article/B6TBK-45X2PMN-8/2/35a11301cbb515872fab227714a730ec)  
569 [8/2/35a11301cbb515872fab227714a730ec](http://www.sciencedirect.com/science/article/B6TBK-45X2PMN-8/2/35a11301cbb515872fab227714a730ec)
- 570 66. Breen JE, Green MJ, Bradley AJ. Quarter and cow risk factors associated with the  
571 occurrence of clinical mastitis in dairy cows in the United Kingdom. *J Dairy Sci.* Elsevier;  
572 2009;92: 2551–61. doi:10.3168/jds.2008-1369
- 573 67. Verteramo Chiu LJ, Tauer LW, Al-Mamun MA, Kaniyamattam K, Smith RL, Gröhn YT.  
574 An agent-based model evaluation of economic control strategies for paratuberculosis in a  
575 dairy herd. *J Dairy Sci.* 2018; doi:10.3168/jds.2017-13175

576

577 **Supporting Information Captions**

578 **S1 Table: Events, changes, and rates used for simulation via Gillespie's direct algorithm**

579 **S2 Table: Paratuberculosis control strategy IDs**

580 **S3 Table: ELISA-based strategies and their NPV distribution and number of dominated**  
581 **strategies for each mastitis scenario and herd type.**

582 **S4 Table: Discounted cost of implementing different possible paratuberculosis controls, not**  
583 **including culling and replacement costs, over a 5 year period in a 1,000-head dairy**  
584 **herd**

585 **S5 Figure: Net Present Value and discounted cost of control for each paratuberculosis**  
586 **control strategy over 5 years in a 1,000-head dairy herd with 7% initial**  
587 **paratuberculosis prevalence and increased mastitis in paratuberculosis-infected cows**

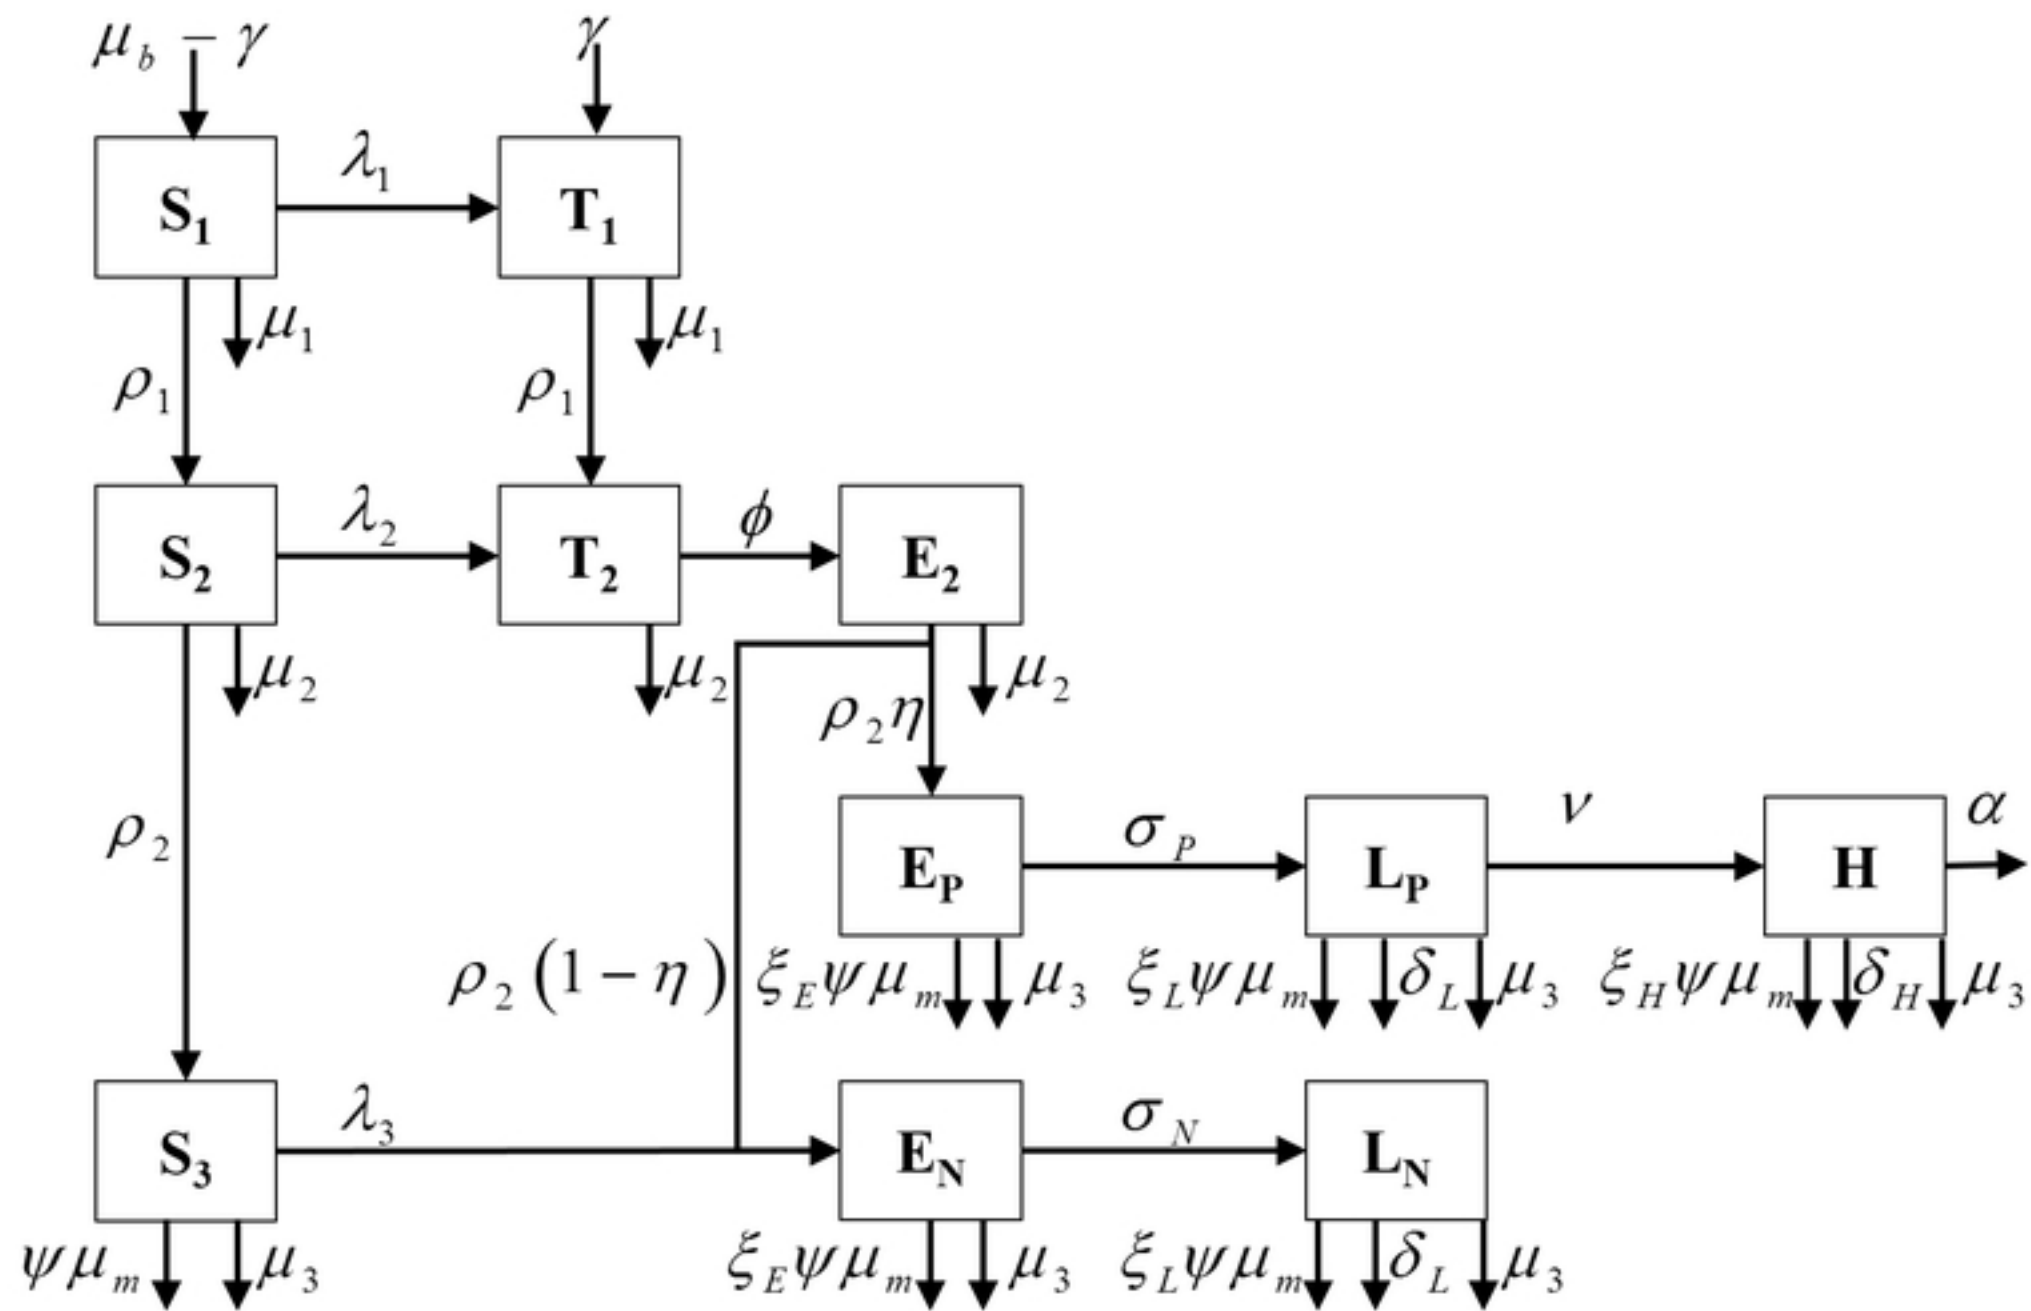

Figure 1

Change in Shedding Prevalence

0.05  
0.00  
-0.05

Annual testing,  
High hygiene

Annual testing,  
Moderate hygiene

Annual testing,  
Standard hygiene

Biannual testing,  
High hygiene

Biannual testing,  
Moderate hygiene

Biannual testing,  
Standard hygiene

test

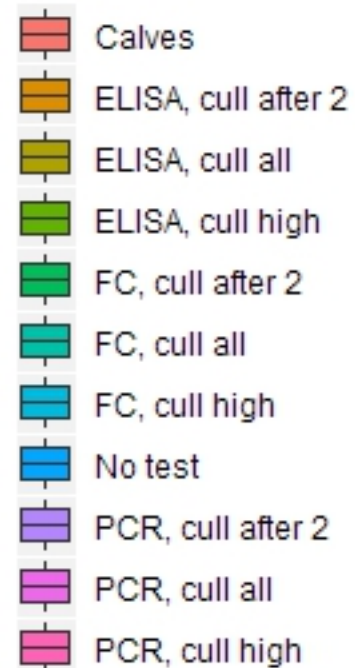

Figure 2



Estimate

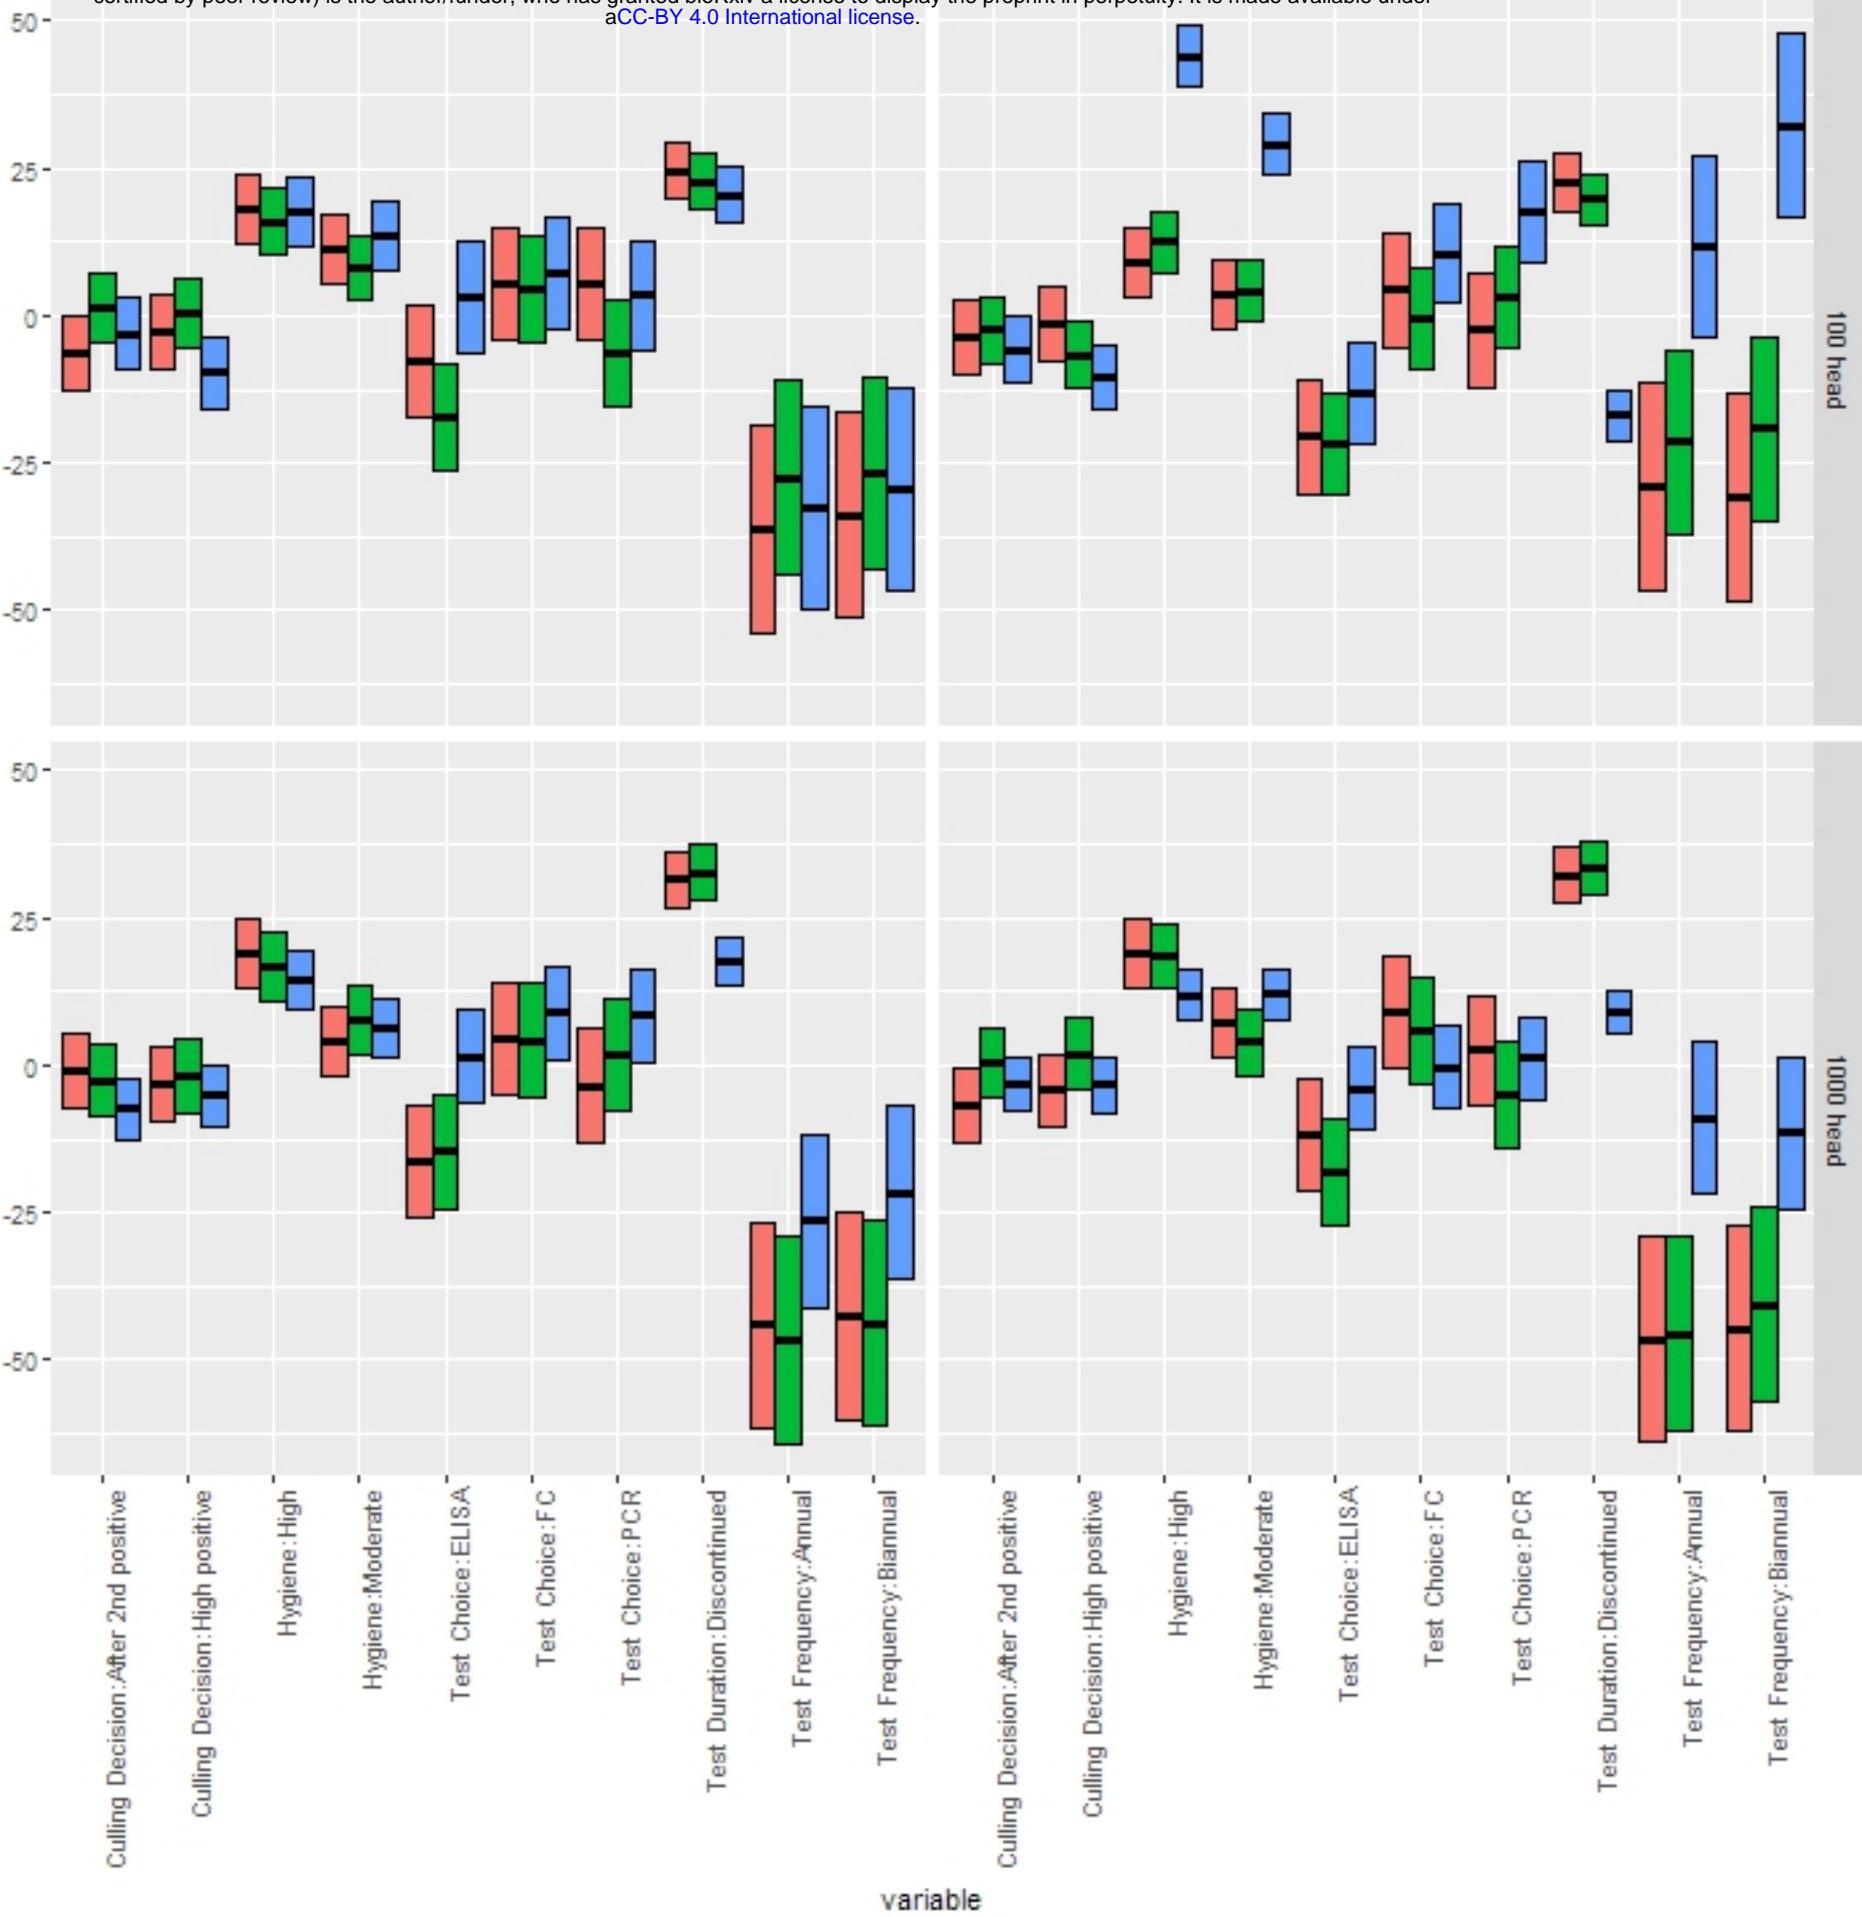

Figure 3

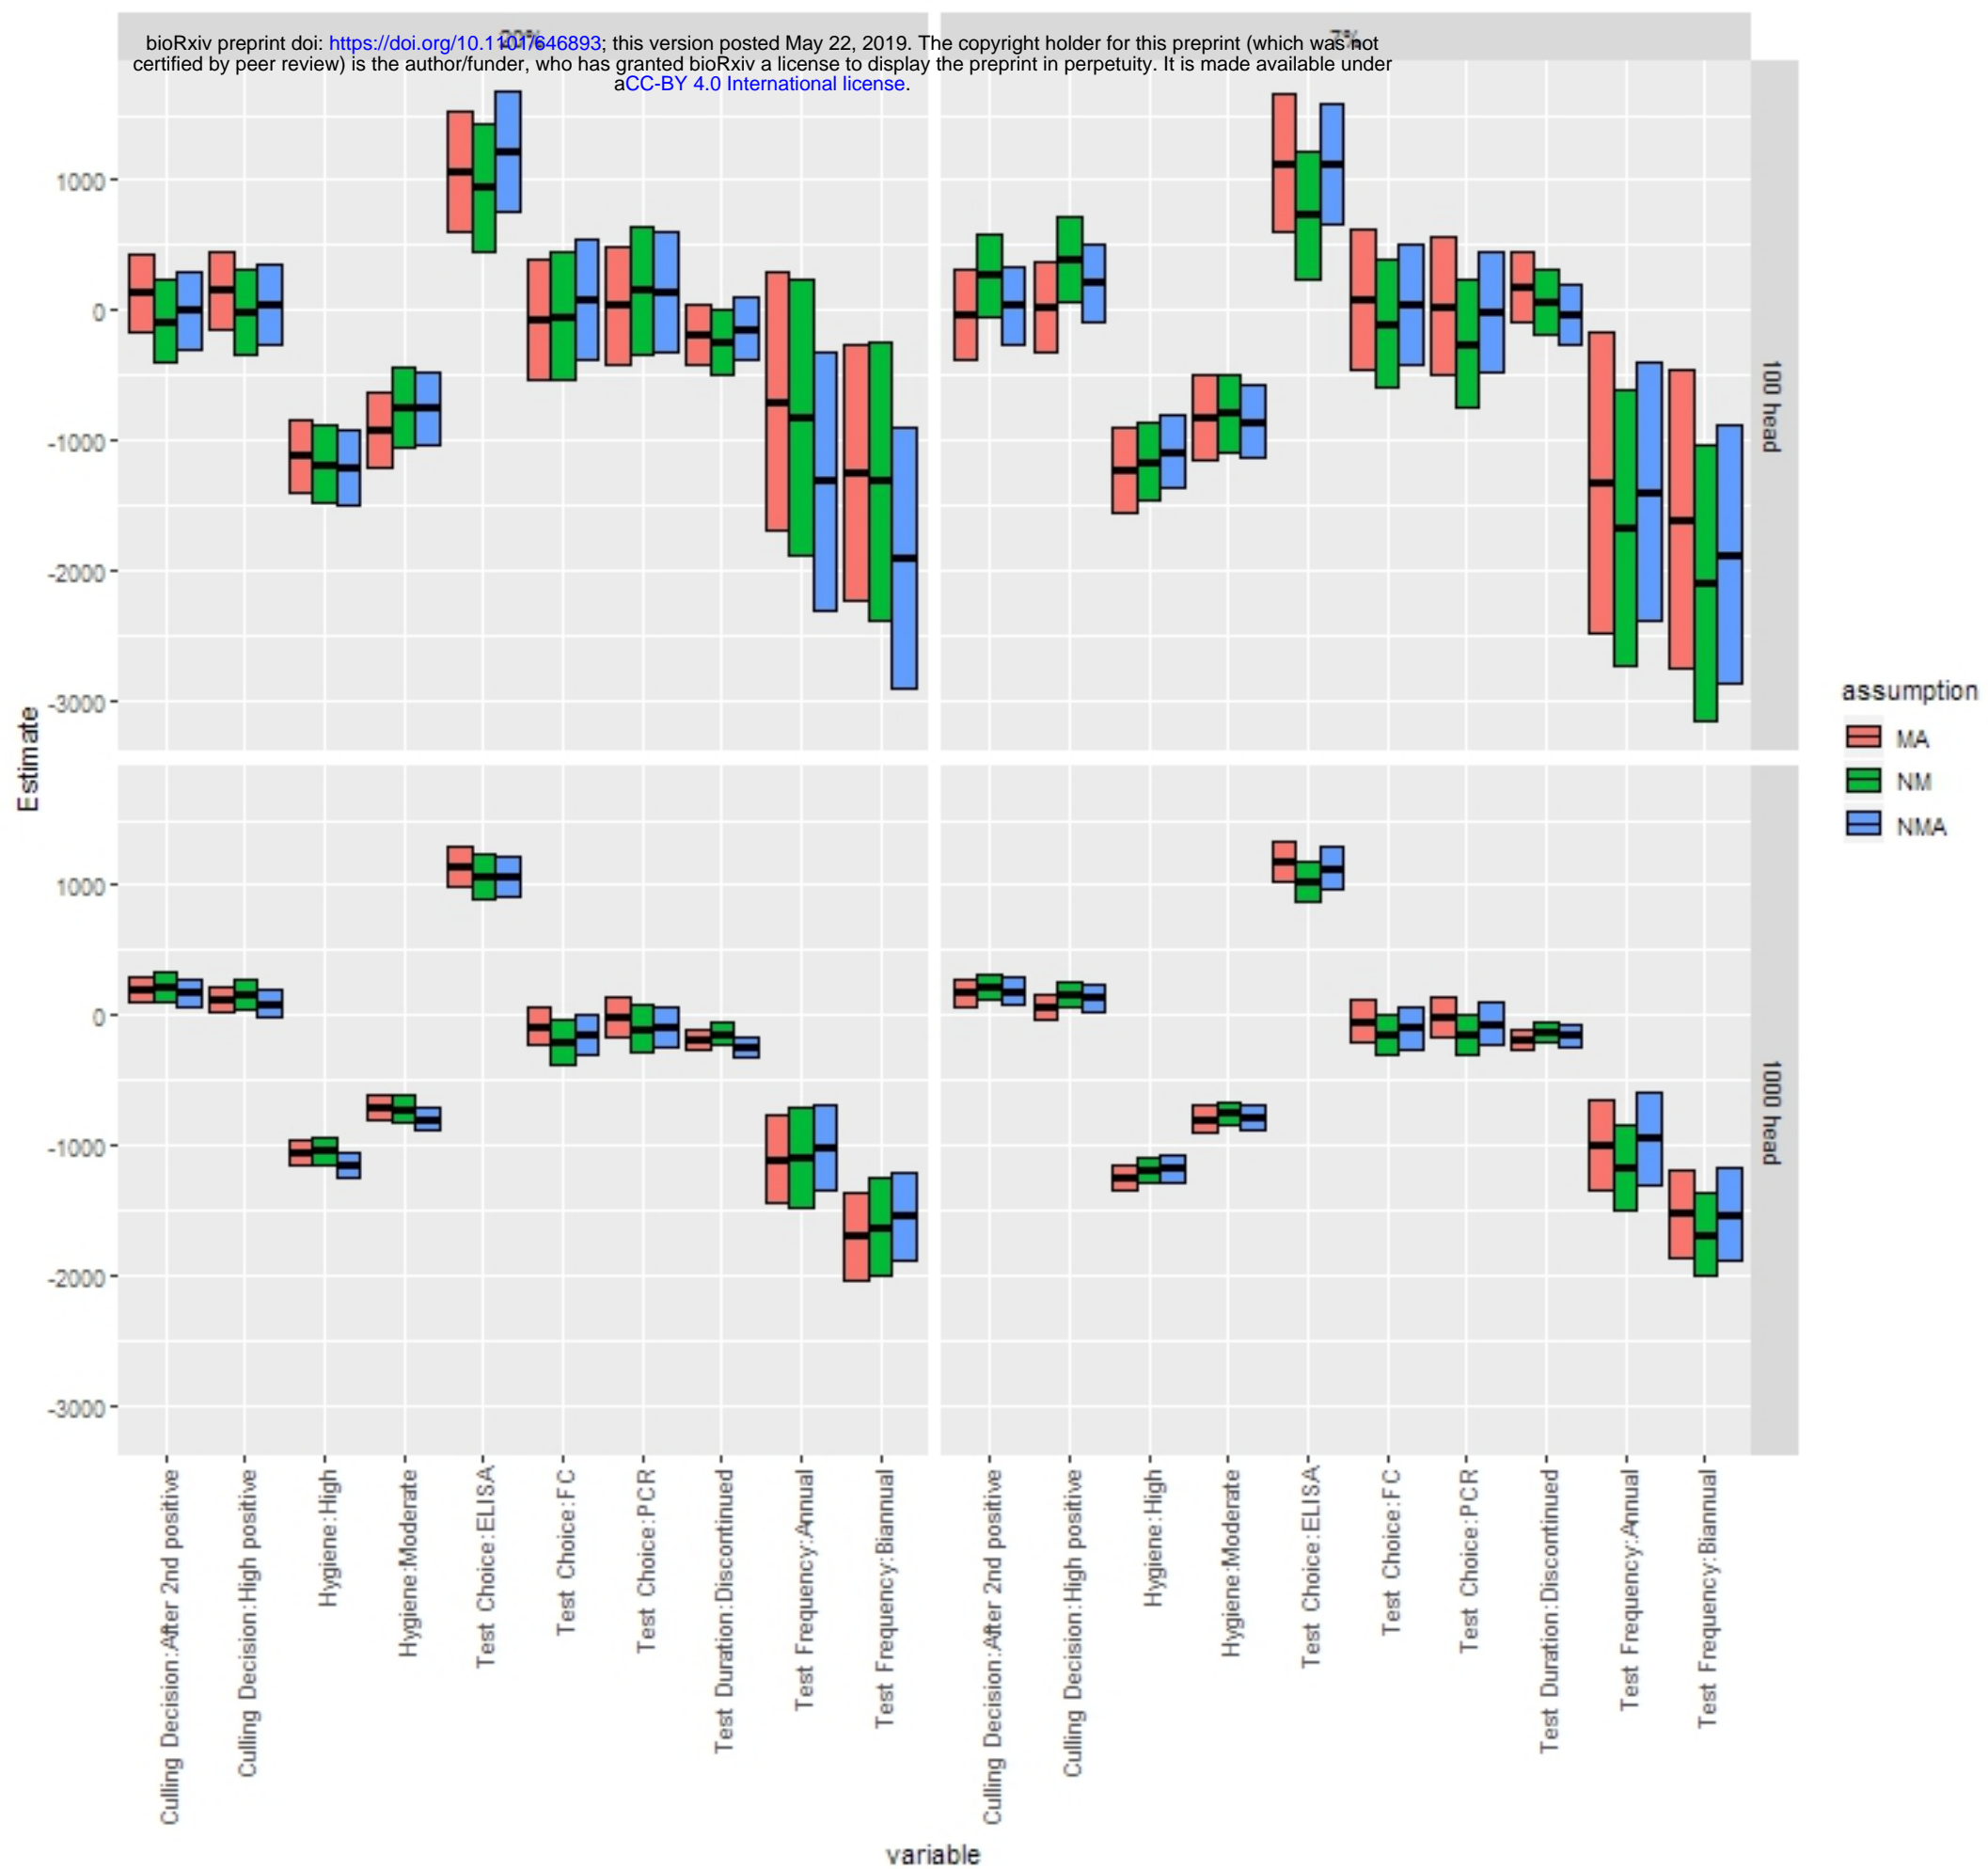

Figure 4

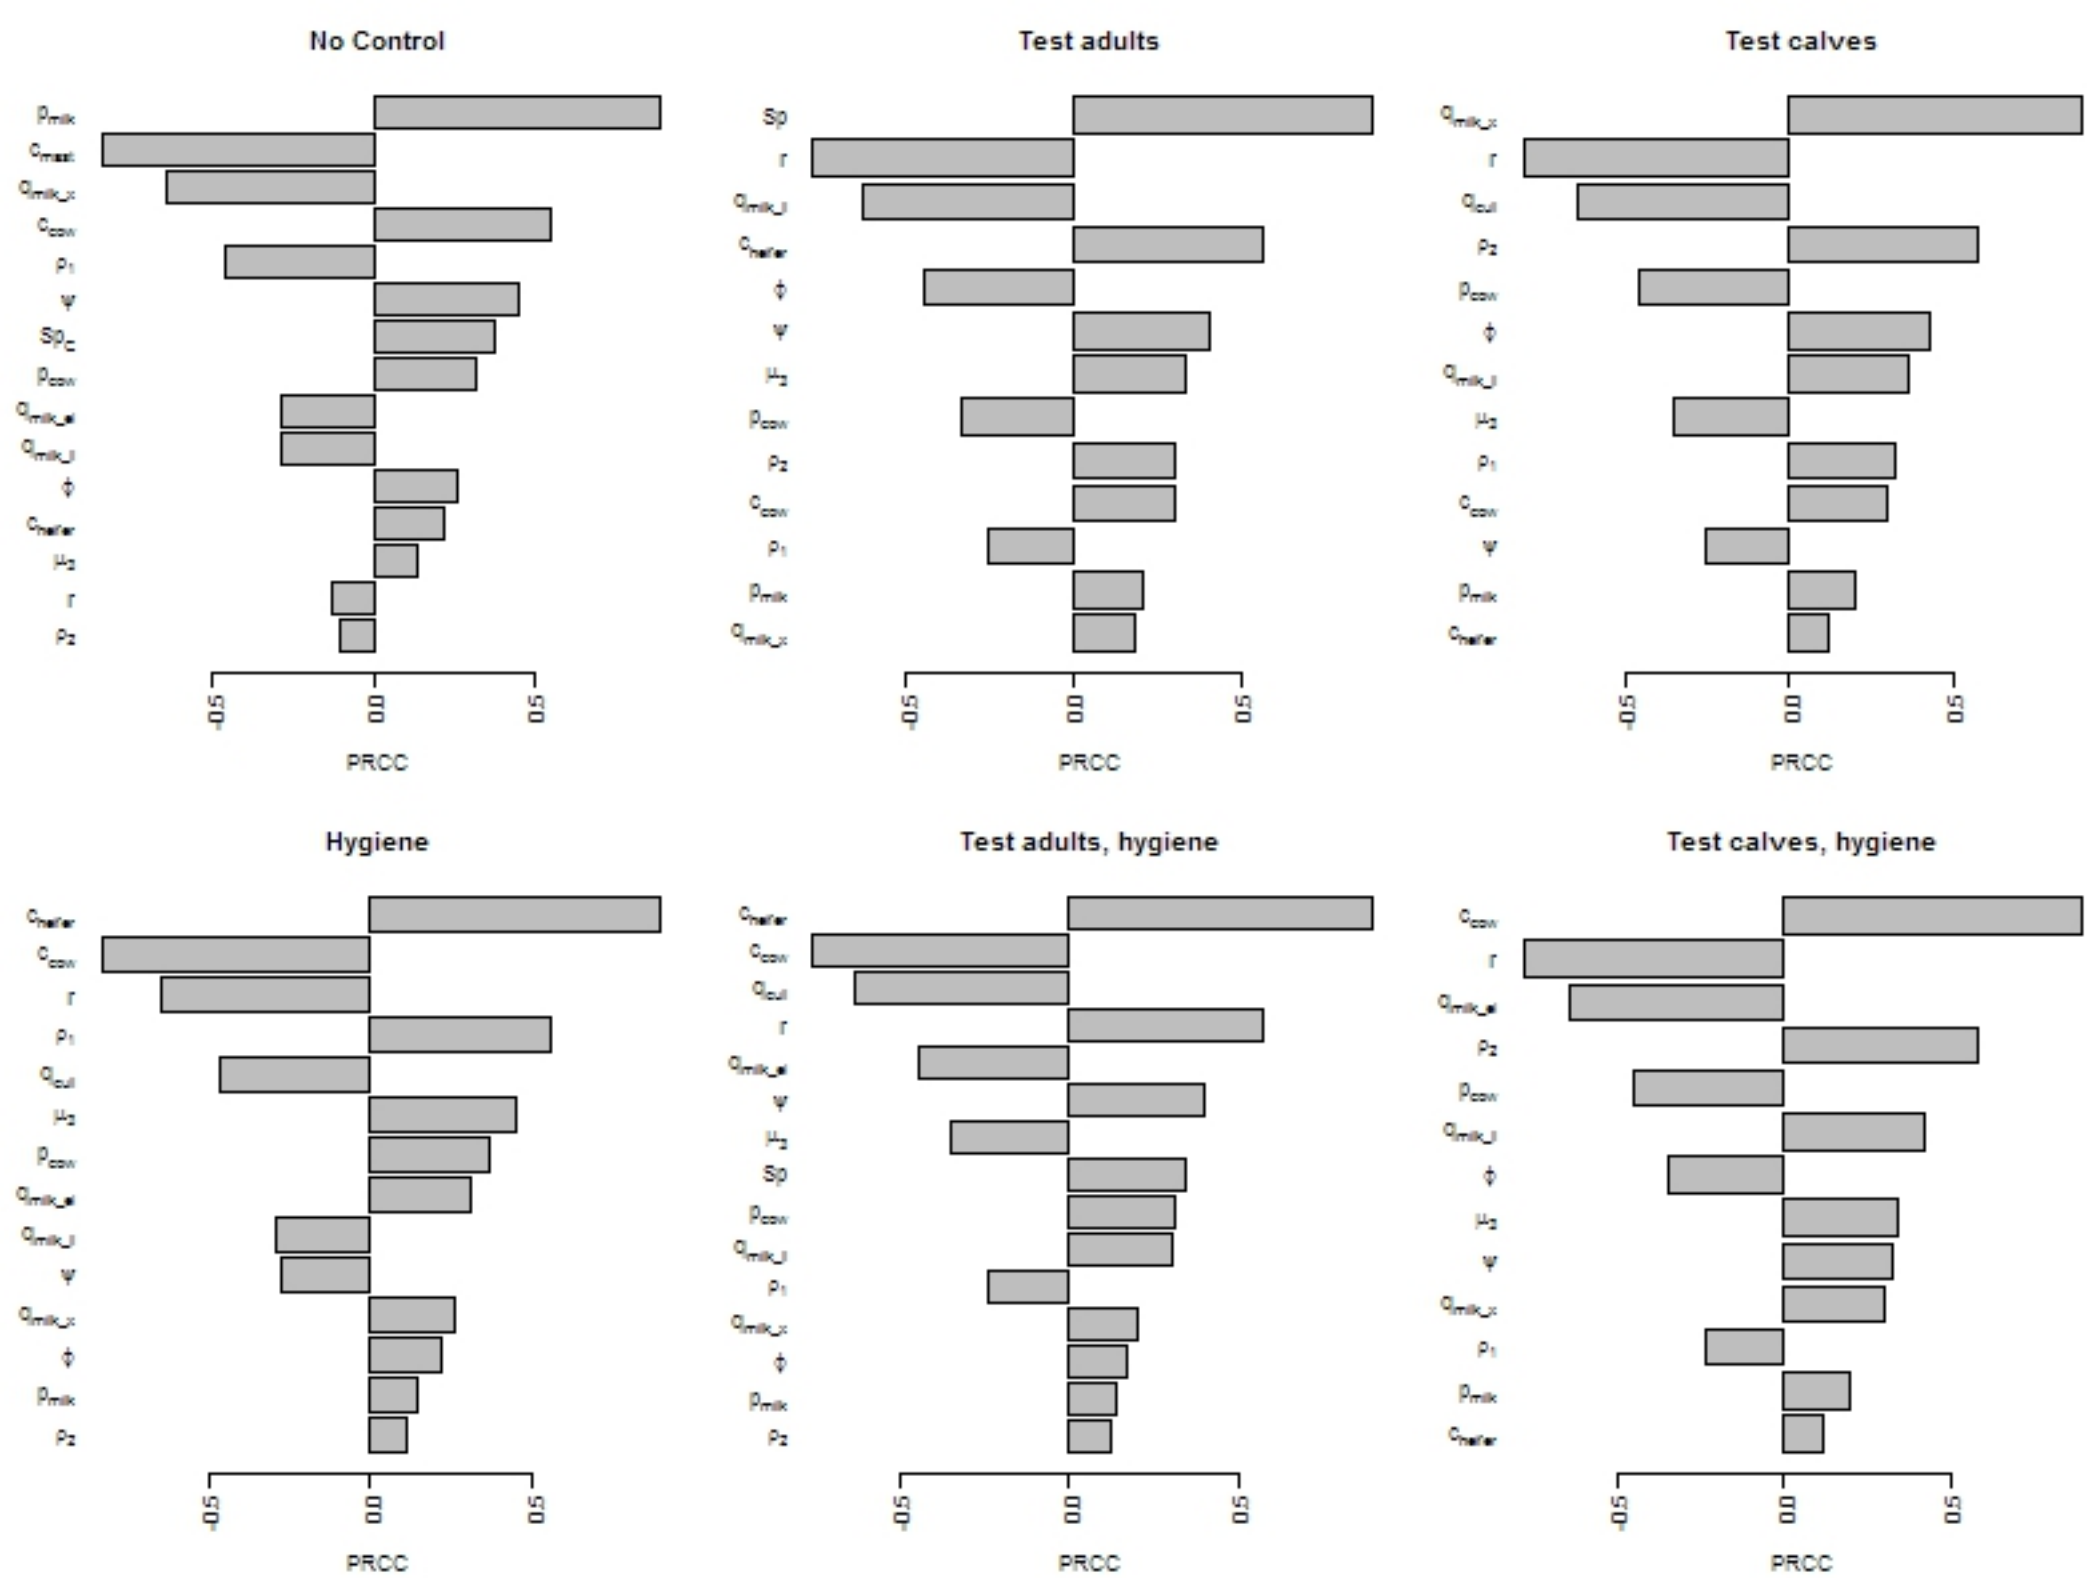

Figure 5
